1 **TITLE**

2 Plasticity and environmental heterogeneity predict geographic resilience patterns of foundation  
3 species to future change

4 **AUTHORS**

5 Luca Telesca,<sup>1,2\*</sup> Lloyd S. Peck,<sup>2</sup> Trystan Sanders,<sup>3</sup> Jakob Thyrring,<sup>4,5</sup> Mikael K. Sejr,<sup>4,5</sup> Elizabeth  
6 M. Harper<sup>1\*</sup>

7 **AFFILIATIONS**

8 <sup>1</sup> Department of Earth Sciences, University of Cambridge, CB2 3EQ Cambridge, UK.

9 <sup>2</sup> British Antarctic Survey, CB3 0ET Cambridge, UK.

10 <sup>3</sup> GEOMAR Helmholtz Centre for Ocean Research, 24105 Kiel, Germany.

11 <sup>4</sup> Department of Bioscience, Arctic Research Centre, Aarhus University, 8000 Aarhus C, Denmark.

12 <sup>5</sup> Department of Bioscience, Marine Ecology, Aarhus University, 8600 Silkeborg, Denmark.

13 \* Corresponding authors: Luca Telesca, email: lt401@cam.ac.uk; Elizabeth M. Harper, email:  
14 emh21@cam.ac.uk

15 **ABSTRACT**

16 Although geographic patterns of species' sensitivity to global environmental changes are defined  
17 by interacting multiple stressors, little is known about the biological mechanisms shaping regional  
18 differences in organismal vulnerability. Here, we examine large-scale spatial variations in  
19 biomineralisation under heterogeneous environmental gradients of temperature, salinity and food  
20 availability across a 30° latitudinal range (3,334 km), to test whether plasticity in calcareous shell  
21 production and composition, from juveniles to large adults, mediates geographic patterns of  
22 resilience to climate change in critical foundation species, the mussels *Mytilus edulis* and *M.*  
23 *trossulus*. We find mussels produced thinner shells with a higher organic content in polar than  
24 temperature regions, indicating decreasing shell calcification towards high latitudes. Salinity was  
25 the major driver of regional differences in mussel shell deposition, and in shell mineral and organic  
26 composition. In low-salinity environments, the production of calcite and organic shell layers was  
27 increased, providing higher resistance against dissolution in more corrosive waters. Conversely,  
28 under higher-salinity regimes, increased aragonite deposition suggests enhanced mechanical  
29 protection from predators. Interacting strong effects of decreasing salinity and increasing food  
30 availability on the compositional shell plasticity in polar and subpolar mussels during growth  
31 predict the deposition of a thicker external organic layer (periostracum) under forecasted future  
32 environmental conditions. This marked response potential of *Mytilus* species suggests a capacity  
33 for increased protection of high-latitude mussel populations from ocean acidification. Our work  
34 illustrates that mechanisms driving plastic responses to the spatial structure of multiple stressors  
35 can define geographic patterns of unforeseen species resilience to global environmental change.

## 36 INTRODUCTION

37 Unprecedented global environmental changes are driving scientists towards increased  
38 understanding of the mechanisms underlying geographic variation in species' responses to future  
39 environmental conditions (1, 2). However, our ability to forecast emergent ecological  
40 consequences of climate change on marine populations, communities and ecosystems remains  
41 limited (3). Ecosystem-wide projections are severely constrained by heterogeneous patterns of  
42 ocean warming and acidification (4), multiple interacting stressors (5), and species-specific  
43 effects (6), as well as predictive models which often exclude important biological mechanisms  
44 when projecting changes to species and ecosystems in response to climate change (2). A better  
45 mechanistic understanding of the biological processes and environmental sources mediating  
46 species' responses to disturbances is critical for building the theoretical baseline necessary to  
47 forecast the combined effects of multiple emerging stressors (2, 3).

48 Advances in macroecology suggest that permanent environmental mosaics, defined by spatial  
49 overlaps of non-monotonic environmental gradients (7), as well as regional adaption or  
50 acclimatization (8–10), dictate geographic variations in species performance and sensitivity to  
51 environmental change in marine ecosystems. Key to these works is that responses vary among  
52 populations and individual taxa (6, 8), which often play disproportionately strong roles in  
53 structuring benthic communities (11). Thus, species-specific biological mechanisms driving  
54 organismal variability may shape differential regional responses of foundation species to co-  
55 occurring multiple drivers. This can establish spatial patterns of unexpected susceptibility of  
56 marine communities to future conditions.

57 Climate change is considered a major threat to marine ecosystems worldwide, with ocean warming  
58 and acidification profoundly affecting species life history and ecology (6, 10), as well as

59 community structure and ecosystem dynamics (11, 12). Species producing calcium carbonate  
60 (CaCO<sub>3</sub>) shells and skeletons are possibly experiencing the strongest impacts of rapid  
61 environmental changes (6). Knowledge on their sensitivity is derived largely from experimentally  
62 induced responses in model organisms (1, 6), while complex variations under multiple stressors  
63 have rarely been investigated in natural environments (7, 11–13). Therefore, inferences made from  
64 experimental studies can be misleading and not fully applicable to marine ecosystems (9). Indeed,  
65 species-specific mechanistic responses to habitat alterations (14) on top of mixed outcomes of  
66 environmental interactions (additive, synergistic or antagonistic) make future ecosystem  
67 predictions extremely challenging. This leaves open the question: do differences in biological  
68 mechanisms, shaping regional calcifiers' responses to interacting environmental stressors, define  
69 geographic patterns of unforeseen species sensitivity or resilience to global environmental change?  
70 A body of research has focused on responses of marine calcifiers to altered water chemistry (1, 6),  
71 but studies have rarely considered changes in biogeochemical cycles that strongly mediate  
72 biological responses to environmental alterations (4). Among those, a marked intensification of  
73 the global water cycle in response to warming (+4% for +0.5°C) has been documented over recent  
74 decades through changes in ocean salinity (15). Salinity is a major ecological factor dictating  
75 survival of aquatic organisms and ecosystem functioning. Multidecadal studies have revealed a  
76 global salinity pattern following the “rich-get-richer” mechanism, where salty ocean regions  
77 (compared to the global mean) are getting saltier (mid-latitudes), whereas low salinity regions are  
78 getting fresher (tropical convergence zones and polar regions) (15). In a future 2-3°C warmer  
79 world (16), a substantial 16-24% intensification of the global water cycle is predicted to occur  
80 making salinity gradients much sharper (15). However, emergent ecological effects of changing  
81 salinity on calcifying species and marine communities are largely unknown.

82 Atlantic mussels, *Mytilus edulis* and *M. trossulus*, are important bed-forming foundation species  
83 throughout the eulittoral ecosystems of the northern hemisphere (up to 90% of epibenthic  
84 biomass), and represent valuable resources for aquaculture (192,000 t produced in 2015 worth 325  
85 million USD) (17). Growing awareness of the consequences of climate change on biodiversity  
86 and industry that *Mytilus* species support have stimulated a number of studies to estimate the  
87 response potential of these habitat-forming calcifiers to changing ocean conditions (18–20).

88 Calcareous shells perform a range of vital functions including structural support and protection  
89 against predators. Because shell integrity determines survival, shell traits are subject to strong  
90 selection pressure with functional success or failure a fundamental evolutionary driver. *Mytilus*  
91 shell consists of three layers (Fig. 1A-B): (1) the outer organic periostracum, (2) the calcified  
92 prismatic and (3) nacreous layers. The periostracum provides the substrate and a protected  
93 environment for shell secretion, and is made of sclerotized proteins, protecting shells from  
94 corrosive, acidic waters as well as predatory and endolithic borers (21). The prismatic and nacreous  
95 layers are composed of different mineral forms of CaCO<sub>3</sub>, calcite and aragonite respectively,  
96 dispersed in an organic matrix (22). These calcareous layers are characterized by different  
97 microstructures and more (e.g. aragonite) or less (e.g. calcite and organics) soluble components  
98 the combination of which determines chemical and mechanical shell properties (23). Differences  
99 in energetic costs of making shell components (13) combined with future shifts in environmental  
100 gradients (4) may influence variations in shell production, composition and structure, shaping  
101 regional patterns of shell strength and resistance to acidification.

102 *Mytilus* growth, biomineralisation and fitness are linked to multiple drivers, including water  
103 temperature, salinity and food supply [chlorophyll-*a* (Chl-*a*) concentration] (24, 25). In the North  
104 Atlantic and Arctic Oceans, these key environmental factors vary heterogeneously with latitude

105 (Fig. 1C-D), encompassing a range of conditions predicted under different future climate change  
106 scenarios (16). Here we hypothesize that biological mechanisms driving spatial variations in shell  
107 production, mineral and organic composition: **i**) shape regional differences in the responses of  
108 *Mytilus* species to interacting environmental drivers, and **ii**) define geographic patterns of  
109 unanticipated mussel vulnerability in the face of global environmental changes.

110 Despite projected environmental alterations (4, 15), salinity gradients have been overlooked in  
111 large-scale models predicting emergent effects of climate changes on marine organisms. This  
112 knowledge is essential to predict whether environmental changes affect shell variability (i.e.  
113 thickness, mineral and organic content) and its properties, especially in calcifying foundation  
114 species such as *M. edulis* and *M. trossulus*. These factors are crucial for understanding species  
115 susceptibility to other rapidly emergent stressors, such as warming and acidification (3).

116 In this study, we examine the relationships between the plasticity in *Mytilus* shell production and  
117 composition (from juveniles to large adults) and interactive environmental gradients of  
118 temperature, salinity and Chl-*a* concentration in 17 populations spanning a latitudinal range of 30°  
119 (3,334 km) across the Atlantic-European and Arctic coastline (Fig. 1C-D). In particular, we test  
120 for a latitudinal effect on *Mytilus* shell calcification (variation in shell thickness and organic  
121 content) that we hypothesize will show a general decrease from temperate to polar regions. We  
122 also identified environmental sources and magnitude of regional variations in shell deposition, to  
123 test whether salinity affects shell production and mineral composition during growth, driving  
124 changes of mechanical and chemical shell properties. Finally, we modelled spatial trends in the  
125 production of individual shell layers with environmental gradients, to test whether biological  
126 mechanisms, driving variations in shell structure and properties, shape regional responses of

127 *Mytilus* to interacting stressors (especially salinity) and define geographic patterns of sensitivity  
128 to future changes.

129

## 130 **RESULTS**

131 Generalized linear (mixed) models, GL(M)Ms, were used to explain shell thickness and  
132 composition, from juveniles to large adults, with respect to latitude and environmental drivers, and  
133 to compare between the individual shell layers.

134

### 135 **Latitudinal patterns of shell deposition**

136 GLMMs indicated a general decrease of *Mytilus* whole-shell thickness with increasing latitude  
137 from warm-temperate to polar regions (Fig. 2A). We detected a significant negative relationship  
138 between the prismatic layer thickness and latitude (Fig. 2A), while no variation in nacreous  
139 thickness, periostracum thickness and relative proportion of prismatic layer thickness (calcite%)  
140 was found (table S1). Shell length was positively correlated with thickness in all layers indicating  
141 thickening during growth (table S1).

142 The weight proportion (wt%) of organic content in the prismatic layer was modelled with a GLM  
143 as a function of collection site and shell thickness. Prismatic layers were characterized by a  
144 significantly higher organic content (lower proportion of CaCO<sub>3</sub>) in mussel shells from polar than  
145 temperate regions, indicating decreased shell calcification at higher latitudes (Fig. 2B). Polar shells  
146 [sites 15, 16; mean (SD) = 1.8 wt% (0.31)] were characterized by an average of 29% more organic  
147 content compared to temperate mussels [sites 1, 11; mean (SD) = 1.4 wt% (0.16)]. The organics  
148 wt% was negatively correlated with prismatic thickness (Fig. 2C), indicating a lower proportion  
149 of CaCO<sub>3</sub> and thinner, so less calcified, shells at polar latitudes.

150

151 **Environmental influence on shell production and composition**

152 Individual GLMMs were fitted to explain spatial variations in the whole-shell thickness,  
153 periostracum thickness and calcite% with environmental gradients during shell growth. We  
154 identified significant trends in shell thickness with environmental gradients depending on the shell  
155 measurement considered (Fig. 3A-E, fig. S1, Table 1). Whole-shell thickness was positively  
156 related to temperature, salinity and shell length, but there was no influence of Chl-*a* ( $cR^2 = 0.93$ ;  
157 Fig. 3A). Salinity had an effect on shell thickness that was 3.4 and 2.1 times larger than temperature  
158 and length, respectively (Fig. 3A, Table 1). We detected a negative relationship between calcite%  
159 and salinity (95% CI = -12.03 to -2.38,  $cR^2 = 0.56$ ) (Fig. 3B, table S2), with none of the other  
160 drivers having a significant effect.

161 Prismatic and nacreous layers thickness were analysed within the same GLMM. After model  
162 selection, fixed continuous covariates of the optimal model, equation (1), were the standardised  
163 *temperature*, *salinity*, *Chl-a* concentration and shell *length* in addition to shell *layer* (categorical,  
164 two levels: prismatic and nacreous) and their interactions. The random component was the  
165 collection *site* used as a random intercept. The model was of the form:

$$\begin{aligned} \ln(\text{Thickness}_{ijk}) &\sim N(\mu_{ijk}; \sigma_j^2) \\ \mu_{ijk} &= \text{Temperature}_{ik} + \text{Salinity}_{ik} + \text{Chl} - a_{ik} + \text{Length}_{ik} + \text{Layer}_j \\ &\quad + \text{Temperature}_{ik} \times \text{Layer}_j + \text{Length}_{ik} \times \text{Layer}_j + \text{Site}_{ij} \\ \text{Site}_{ij} &\sim N(0; \sigma_{\text{Site}}^2) \end{aligned} \tag{1}$$

167 where  $\text{Thickness}_{ijk}$  is the  $k$ th thickness observation from layer  $j$  ( $j = \text{prismatic, nacreous}$ ) and site  $i$   
168 ( $i = 1, \dots, 17$ ).  $\text{Site}_{ij}$  is the random intercept for layer  $j$ , which is assumed to be normally distributed  
169 with mean 0 and variance  $\sigma_{\text{Site}}^2$ .



170 Sea surface temperature, salinity and shell length all successfully predicted ( $cR^2 = 0.93$ ) variations  
171 in the thickness of prismatic and nacreous layers, while no influence of Chl-*a* was detected (Table  
172 1). The mean effect size of salinity on the response was twice as large as the effect of shell length,  
173 while it was 2.9 and 4.7 times larger than the effect of temperature on the prismatic and nacreous  
174 layers, respectively (equation (2), Fig. 3C-D). This indicates salinity had a stronger contribution  
175 to predicting shell structure than the effects of temperature, Chl-*a* and shell length combined (Fig.  
176 4).

$$\mu_{ijk} = \begin{cases} 5.907 + 0.138 \times \text{Temperature} + 0.396 \times \text{Salinity} + 0.028 \times \text{Chl-}a + 0.197 \times \text{Length} & \text{Prismatic} \\ 5.853 + 0.138 \times \text{Temperature} + 0.654 \times \text{Salinity} + 0.028 \times \text{Chl-}a + 0.308 \times \text{Length} & \text{Nacreous} \end{cases} \quad (2)$$

178 Interactions between shell layer and both salinity and shell length (equation (2)) indicate deposition  
179 of proportionally thicker prismatic layers under low salinities and proportionally thicker nacreous  
180 layers under higher salinities across the entire range of shell lengths (Fig. 4).

181

### 182 **Periostracum plasticity**

183 Models of periostracum thickness revealed significant exponential relationships with Chl-*a* and  
184 shell length ( $cR^2 = 0.81$ ) (Table 1). Length had a mean effect that was 3 times larger than Chl-*a*  
185 (Fig. 3E), showing a rapid thickening of the periostracum during shell growth. The interactions  
186 between shell length and both salinity and temperature indicate that the effects of these variables  
187 on periostracum were interdependent. At low salinities, the higher values of shell length had a  
188 greater positive effect on periostracum thickness, while the reverse was true for higher  
189 temperatures having a marginal effect only on thickening rates (Fig. 5A-B). This suggests that  
190 increasing shell size was a more important factor for periostracum growth in fresher waters than  
191 in relatively saltier conditions.

192

193

### **Among-site shell variation**

194

GLMMs showed no difference in collection site-level effects (conditional modes) on each thickness measurement (Fig. 5C). This indicated no residual effect of species identity or hybridization on the thickness of individual shell layers at different sites after accounting for the effects of environmental factors and shell length.

197

198

## **DISCUSSION**

200

Our results demonstrate that plasticity in shell production in *Mytilus* species and the spatial structure of environmental conditions drive geographic variations in shell responses shaping regional differences in the resilience of these foundation species to global environmental change.

201

202

An understanding of the biological mechanisms driving regional species' responses to multiple interacting stressors is crucial for improving predictive accuracy and informing more realistic projections of species and ecosystem resilience to climate change (2). Heterogeneous population-level responses from different climates suggest that environmental stressors, especially salinity, drive regional variations in *Mytilus* shell production, mineral (prismatic and nacreous) and organic (periostracum) composition during growth, which is reflected in the relative proportion of each shell layer. Variations in shell production and composition determine geographic differences in chemical and mechanical protection of shells, shaping the vulnerability of these habitat-forming species to future conditions.

203

204

205

206

207

208

209

210

211

212

Decreasing shell calcification (increasing organic content and thinner shells) towards high latitudes (Fig. 2) supports documented patterns of skeletal production (13, 26). Two explanatory paradigms exist for decreased skeletal size at higher latitudes: increased calcification costs (13) and reduced

213

214

215 predation pressure (27). Given the higher production cost of organics than CaCO<sub>3</sub> deposition (13)  
216 and problematic protein production at polar temperatures (28), we might expect a reduced  
217 proportion of organic matrix. Moreover, decreasing predation pressure (27) should result in thinner  
218 shells of the same composition irrespective of geographic area. However, the wt% of organic  
219 matrix was higher at Arctic latitudes. This could suggest either (or a combination of) a marked  
220 increase in the cost of calcification in polar regions (13), altering significantly the relative costs of  
221 CaCO<sub>3</sub> and organics production, or a decreased saturation state (increased dissolution) of CaCO<sub>3</sub>  
222 due to low temperatures and, more importantly, salinity (low [Ca<sup>2+</sup>] availability) (25). In either  
223 case, these underlying effects would result in decreased shell calcification at high latitudes. This  
224 increased proportion of organic matrix could protect the calcified shell components from  
225 dissolution and have an adaptive beneficial effect in more corrosive conditions.

226 Our results illustrate that different drivers significantly affect both shell thickness and composition  
227 in *Mytilus* (Fig. 3). For over 60 years, temperature and shell size have been considered key drivers  
228 of CaCO<sub>3</sub> shell mineralogy across latitudes, dictating the formation of predominantly aragonitic  
229 structures in temperate regions and increased calcite precipitation in cold climates (29–31).  
230 Although our study partly supports previous findings, we demonstrate that salinity has the  
231 strongest influence on shell production and composition in *Mytilus*, which is contrary to the general  
232 assumption of temperature and shell size being the primary drivers of shell compositional  
233 plasticity.

234 The interaction between shell layer, salinity and shell size indicates heterogeneous, age-related  
235 compositional changes in *Mytilus* shells across different salinities (Fig. 4A). Shifts in shell  
236 properties from juveniles to large adults are strongly modulated by salinity, which leads to the  
237 formation of exclusively prismatic-dominated shells in brackish waters and nacreous-dominated

238 structures under marine conditions (Fig. 4B). These patterns, which we show were independent of  
239 species or hybrid status (Fig. 5C), indicate that mussel shell plasticity during growth (the *Length*  
240  $\times$  *Layer* interaction, equation (1)) has an indirect effect on layer thickness by allowing salinity-  
241 induced compositional changes and, therefore, the production of the most appropriate shell  
242 structure for specific environmental conditions.

243 Under current scenarios, plasticity in shell production could confer *Mytilus* species an advantage  
244 when facing different water chemistries and predation levels. In fact, at high-latitudes and in the  
245 Baltic region, where durophagous (shell-breaking) predators are rare or absent and the water is  
246 more corrosive (13, 27), mussels are characterized by thinner, prismatic-dominated shells,  
247 providing a generally higher protection from dissolution. Conversely, at mid-latitudes, where  
248 durophagous predators are more abundant and the CaCO<sub>3</sub> solubility of the water is lower (13),  
249 mussels display thicker, nacreous-dominated shells with higher mechanical resistance.

250 Despite rapid global changes in the water cycle and salinity gradients (15), *Mytilus* species shows  
251 a strong capacity to respond to heterogeneous environments. This plasticity in shell production  
252 could help to mitigate the emergent negative effects of changing water chemistry. In fact, the  
253 interacting effects of salinity and shell length, as well as a minor influence of temperature, on the  
254 periostracum (Fig. 5A-B), which represents a strong chemical barrier to dissolution in molluscs  
255 (21, 32, 33), suggest enhanced periostracal thickness under decreasing salinities could mediate  
256 impacts of ocean acidification.

257 Although populations in high-latitude ecosystems will experience globally the most rapid  
258 acidification (4), the concurrent decrease in salinity predicts thicker prismatic layers and  
259 periostraca will be produced which increase protection from higher solubility conditions.

260 Conversely, in temperate areas, increasing salinity would determine deposition of thicker shells  
261 and a relatively thicker nacreous layer and thinner periostracum, favouring mechanical shell  
262 resistance. However, predicted changes in periostracal thickening rate under different salinities  
263 depend on shell size and would be more evident in larger individuals (length > 48 mm) (Fig. 5A).

264 In Greenland, where the rate of melting of the ice sheet has doubled in the last decade (34), low  
265 salinities during summer (< 20 psu) and high productivity (food supply) in coastal areas and fjords  
266 (35) predict formation of thicker periostraca and increased relative thickness of organic-enriched  
267 (high wt%) calcitic layers. These changes could make Arctic *Mytilus* populations more resilient to  
268 future acidification. Differently, in the Baltic Sea, the forecasted decrease in salinity (maximum  
269 45% reduction) (36), combined with a considerable physiological stress, would be particularly  
270 critical for mussels inhabiting already unfavourable conditions for calcification (salinity from 22  
271 psu to 3 psu, low water [Ca<sup>2+</sup>], and CaCO<sub>3</sub> saturation state) (25). Moreover, the reduced shell size  
272 of Baltic *Mytilus* does not predict formation of thicker periostraca, which would further increase  
273 vulnerability to dissolution. Impacts of changing salinity on this habitat-forming species, which  
274 contributes up to 90% of the Baltic benthic biomass, could strongly affect the ecosystem, most  
275 likely resulting in substantial range restrictions towards higher salinity areas.

276 Although our results strongly support the hypothesis that biological mechanisms for variations in  
277 shell production can shape regional responses in *Mytilus*, changes of other biological drivers, such  
278 as predation pressure and primary production, could also have profound influences (13, 37). In  
279 fact, as temperature rises, durophagous predators could expand their ranges towards polar regions  
280 (38), suggesting an increased vulnerability of thin-shelled individuals. However, predicted  
281 northward phytoplankton expansions and an overall increase in primary production at high

282 latitudes (37), could favour periostracal growth potential in *Mytilus* and, thus, increased resistance  
283 to dissolution for all the size classes in polar and subpolar regions.

284 *Mytilus* shells have a thick periostracum and a marked compositional plasticity compared to other  
285 calcifiers that often compete with it for space (e.g. barnacles and spirorbid polychaetes). This layer  
286 provides a strong defence against shell dissolution allowing mytilids to survive in oligohaline  
287 waters (~5 psu) and extremely acidified conditions (e.g. hydrothermal vents) (33). These factors  
288 may shift the ecological balance and community structure in favour of species with stronger  
289 resistance to corrosive conditions, such as mussels, when ocean waters become fresher and more  
290 acidic in future decades.

291 As hypothesised, plasticity in shell production and the spatial structure of environmental  
292 conditions drive regional differences in *Mytilus* shell deposition and composition, shaping spatial  
293 patterns of chemical and mechanical shell properties. Overall, mussel shell calcification decreased  
294 towards high latitudes, with salinity being the major driver of geographical variations in shell  
295 production, mineral and organic composition. The marked compositional plasticity in calcareous  
296 shell components (prismatics and nacreous layers) suggest an higher resistance against dissolution  
297 for mussels in polar, low-salinity environments, and an enhanced mechanical shell protection from  
298 predators in temperate, higher-salinity regions. The strong response potential of *Mytilus* shell  
299 periostracum to heterogeneous environments predicts an increased resilience to ocean acidification  
300 in polar and sub-polar mussels, and a higher sensitivity of Baltic populations under future  
301 environmental conditions.

302 In conclusion, our findings demonstrate that biological mechanisms, driving spatial variability of  
303 mussel responses to interacting environmental factors, shape the complex geographic pattern of

304 shell deposition and properties, dictating regional differences in *Mytilus* species sensitivity to  
305 future environmental change. As the magnitude of anthropogenic impacts continue to increase,  
306 further studies are need to better understand the key biological processes mediating species'  
307 response to habitat alterations, especially for those having both high climate sensitivity and  
308 disproportionately strong ecological impacts in shaping marine communities. This knowledge  
309 underpins our ability to predict accurately and reduce the damaging effect of climate change on  
310 future biodiversity under any range of scenarios (2). Our study has important implications because  
311 it clarifies the links between (i) the mechanisms of biological variation, (ii) the predicted shift in  
312 spatial co-occurrence of multiple environmental drivers, and (iii) regional differences in the plastic  
313 responses and sensitivity of calcifying, foundation species to changing habitats. This  
314 understanding is of critical importance for making realistic projections of emergent ecological  
315 effects of global environmental changes, such as altered salinity regimes, and to improve our  
316 predictive accuracy for impacts on marine communities and ecosystems, and the services they  
317 provide.

318

## 319 **MATERIALS AND METHODS**

### 320 ***Mytilus* collection**

321 We sampled individuals from a total of 17 *Mytilus* (*Mytilus edulis* and *M. trossulus*) populations  
322 along the North Atlantic, Arctic and Baltic Sea coastlines from four distinctive climatic regions  
323 (warm-temperate, cold-temperate, subpolar and polar) covering a latitudinal range of 30° (a  
324 distance of 3,334 km), from Western European (Brest, North-West France, 48°N) to Northern  
325 Greenlandic (Qaanaaq, North-West Greenland 78°N) coastlines (Fig. 1C). During December 2014  
326 - September 2015, mussels of various size classes for each site (shell length 26-81 mm) were

327 sampled from the eulittoral zone on rocky shores for a total of 424 individuals (table S3). For each  
328 specimen, shell length was measured with digital calipers (0.01 mm precision) and used as a  
329 within-population proxy for age.

330 We analysed *Mytilus* populations of which the genetic structure was known, with particular focus  
331 on species identity and hybrid status (*M. edulis* × *M. trossulus*). *Mytilus* shells used were either  
332 from specimens already evaluated in genetic investigations or mussels obtained from sites  
333 routinely used in regional monitoring programs that provided information on species identity (table  
334 S3). Areas where the Mediterranean mussel, *Mytilus galloprovincialis*, was present were avoided.  
335 We did, however, sample few sites with very low levels of *M. edulis* × *M. galloprovincialis*  
336 hybridization.

337

### 338 **Mussel shell preparation**

339 We set left shell valves in polyester resin (Kleer-Set FF, MetPrep, Coventry, U.K.) blocks.  
340 Embedded specimens were sliced longitudinally along their axis of maximum growth (Fig. 1A)  
341 using a diamond saw and then progressively polished with silicon carbide paper (grit size: P800-  
342 P2500) and diamond paste (grading: 9-1 µm). Photographs of polished sections (Fig. 1B) were  
343 acquired with a stereo-microscope (Leica M165 C equipped with a DFC295 HD camera, Leica,  
344 Wetzlar, Germany) and shell thickness (µm) was measured using the Fiji software (v1.51u). Since  
345 larger individuals had undergone evident environmental abrasion or dissolution which removed  
346 the periostracum and prismatic layer closer to the umbo, we estimated the thickness of the whole-  
347 shell, prismatic and nacreous layers at the midpoint along the shell cross-section. The proportion  
348 of calcite was estimated as

$$349 \text{ calcite\%} = (\text{prismatic thickness} / \text{whole-shell thickness}) \times 100$$



350 Periostracum thickness was measured at the posterior edge where it attaches to the external side  
351 of the prismatic layer, to estimate the fully formed organic layer that was unaffected by decay or  
352 abrasion (21).

353

### 354 **Organic content analyses**

355 We performed thermogravimetric analyses (TGA) to estimate the weight proportion (wt%) of  
356 organic matrix within the prismatic layer. *Mytilus edulis* specimens were selected from four  
357 populations (sites 1, 11, 15, 16) to explore differences in shell organic content under temperate  
358 and polar regimes. We removed the periostracum by sanding, and prismatic layer tiles ( $8 \times 5$  mm,  
359  $N = 20 \times 4$  sites) were isolated along the posteroventral shell margin. Tiles were cleaned, air-dried  
360 and then finely ground. We tested ten milligrams of this powdered shell with a thermogravimetric  
361 analyser (TGA Q500, TA Instruments, New Castle, DE, U.S.A.). Samples were subjected to  
362 constant heating from  $\sim 25^\circ\text{C}$  to  $700^\circ\text{C}$  at a linear rate of  $10^\circ\text{C min}^{-1}$  under a dynamic nitrogen  
363 atmosphere and weight changes were recorded (Supplementary Material and Methods). We  
364 estimated the wt% of organic matter within the shell microstructure as the proportion of weight  
365 loss during the thermal treatment between  $150^\circ\text{C}$  and  $550^\circ\text{C}$  (fig. S2).

366

### 367 **Environmental characterization**

368 We selected three key environmental drivers based on their known influence on mussel growth,  
369 their level of collinearity across the geographic scale investigated and the forecasted major ocean  
370 alterations under climate change (16). For each site, measurements of sea surface temperature,  
371 salinity and Chl-*a* concentration, the latter being used as a proxy for food supply (24), were  
372 generated using the Copernicus Marine Environment Monitoring Service (CMEMS)

373 (http://marine.copernicus.eu/). These climate datasets are composed of high-resolution physical  
374 and biogeochemical assimilated (integration of observational and predicted information) daily data  
375 ( $N = 2,191$  per parameter) (see data file S1). To provide a first order approximation of the water  
376 conditions prevailing during the near-maximum rates of shell deposition (30), we expressed  
377 parameters as mean May-October values averaged over the 6-year period 2009-2014 and used  
378 these as input variables (Fig. 1D, table S4).

379 Direct environmental monitoring for each site was not feasible due to the number of populations  
380 analysed, their geographic range ( $> 3,300$  km) and the temporal resolution (6 years) required to  
381 estimate the average growth conditions during the lifespan of sampled specimens. For this large-  
382 scale study, remote-sensing and assimilated data presented potential advantages compared to  
383 traditional measurements due to their high spatio-temporal resolution, advanced calibration and  
384 validation (i.e. high correlation with discrete field measurements).

385

### 386 **Statistical analysis**

387 GLMMs were applied to account for the hierarchical structure of the dataset consisting of multiple  
388 specimens ( $N = 24-26$  replicates) from each collection site and to generalize our results to *Mytilus*  
389 populations beyond the study sample.

390 We carried out data exploration following the protocol of Zuur *et al.* (39). Initial inspection  
391 revealed no outliers. Pairwise scatterplots and variance inflation factors (VIFs) were calculated to  
392 check for collinearity between input variables. VIF values  $< 2$  indicated an acceptable degree of  
393 correlation among covariates to be included within the same model. We applied residual regression  
394 to uncouple the unique from the shared contribution of temperature and Chl-*a* concentration to the  
395 response (40). This allowed us to account for the existing causal link between these two parameters

396 and to avoid inferential problems from modelling non-independent covariates without losing  
397 explanatory power (40). To directly compare model estimates from predictors on different  
398 measurement scales, estimate biologically meaningful intercepts and interpret main effects when  
399 interactions are present, we standardised all the input variables (environmental parameters and  
400 shell length). For standardisation, we subtracted the sample mean from the variable values and  
401 divided them by the sample standard deviation [ $z_i = (x_i - \bar{x}) / \sigma_x$ ]. Preliminary inspection of  
402 residual patterns showed heteroscedasticity in most models. The use of different continuous  
403 probability distributions (i.e. gamma) and link functions did not stabilize the variance, therefore a  
404 ln-transformation of the response was required, except for calcite% and wt% measurements.  
405 Response variables did not require further transformations.

406 We used separate GLMMs to explore patterns of shell thickness of individual layers with latitude  
407 and shell length (size). The proportion (wt%) of organic matrix ( $N = 80$ ) was modelled as a function  
408 of site (categorical, four levels) and prismatic thickness (continuous) to test for differences  
409 between polar and temperate regions and association with shell thickness. The response variable  
410 was coded as a value from 0 to 1; therefore, we used a GLM with a beta distribution and a logistic  
411 link function. Pair-wise contrasts with a Bonferroni correction were then used to test for  
412 differences in wt% among sites within and between climatic regions.

413 Different approaches were used to investigate the relationships between shell thickness and  
414 environmental gradients. Whole-shell thickness, periostracum thickness and calcite% were  
415 modelled separately ( $N = 424$  each). Prismatic and nacreous layer thickness were analysed within  
416 the same GLMM, allowing the simultaneous prediction of common and divergent environmental  
417 effects on both layers and to reduce the probability of type I error. To model shell thickness ( $N =$

418 424 × 2 layers) as a function of the environmental predictors we used a GLMM with a normal  
419 distribution (equation (1)). In the initial model, fixed continuous covariates were the standardised  
420 temperature, salinity and Chl-*a* in addition to shell layer (categorical, two levels) and their two-  
421 way interactions. Shell length (continuous) was included to control for possible effects of within  
422 population age on layer thickness. To incorporate the dependency among observations for a  
423 specific layer from the same collection site, we used site as a random intercept.

424 Models were optimized by first selecting the random structure and then the optimal fixed  
425 component. The principal tools for model comparison were the corrected Akaike Information  
426 Criterion (AICc) and bootstrapped likelihood ratio tests. Random terms were selected on prior  
427 knowledge of the dependency structure of the dataset. Visual inspection of residual patterns  
428 indicated violation of homogeneity in most cases. This required the use of variance structures  
429 (generalized least squares) allowing the residual spread to vary with respect to shell layer. The  
430 fixed component was optimized by rejecting only non-significant interaction terms that minimized  
431 the AICc value. For all model comparisons, variation of AICc between the optimal (lowest AICc  
432 value) and competing models were greater than 8, and fixed-effect estimates were nearly identical,  
433 indicating that competing models were very unlikely to be superior (41). The proportion of  
434 variance explained by the models was quantified with conditional or pseudo determination  
435 coefficients ( $cR^2$  or  $\text{pseudo}R^2$ ). We used variograms to assess the absence of spatial  
436 autocorrelation. Final models were validated by inspection of standardised residual patterns to  
437 verify GLMM assumptions of normality, homogeneity and independence. We used optimal  
438 models to estimate the mean effect sizes (same measurement scale) of environmental drivers on  
439 the response. Ninety-five per cent confidence intervals (95% CI) for the regression parameters  
440 were generated using bias-corrected parametric bootstrap methods (10,000 iterations). 95% CIs

441 were used for statistical inference due to estimation of approximated significance values ( $P$ -value)  
442 in mixed-modelling. If the confidence intervals did not overlap zero, then the effect was considered  
443 significant. All data exploration and statistical analyses were performed in R (v3.4.1) (for packages  
444 see table S5).

445

## 446 REFERENCES

- 447 1. I. Nagelkerken, S. D. Connell, Global alteration of ocean ecosystem functioning due to increasing  
448 human CO<sub>2</sub> emissions. *Proc. Natl. Acad. Sci. U.S.A.* **112**, 13272–13277 (2015).
- 449 2. M. C. Urban, G. Bocedi, A. P. Hendry, J.-B. Mihoub, G. Peer, A. Singer, J. R. Bridle, L. G.  
450 Crozier, L. De Meester, W. Godsoe, A. Gonzalez, J. J. Hellmann, R. D. Holt, A. Huth, K. Johst,  
451 C. B. Krug, P. W. Leadley, S. C. F. Palmer, J. H. Pantel, A. Schmitz, P. A. Zollner, J. M. J.  
452 Travis, Improving the forecast for biodiversity under climate change. *Science*. **353**, aad8466  
453 (2016).
- 454 3. K. J. Kroeker, R. L. Kordas, C. D. G. Harley, Embracing interactions in ocean acidification  
455 research: confronting multiple stressor scenarios and context dependence. *Biol. Lett.* **13**,  
456 20160802 (2017).
- 457 4. J. P. Gattuso, A. Magnan, R. Bille, W. W. L. Cheung, E. L. Howes, F. Joos, D. Allemand, L.  
458 Bopp, S. R. Cooley, C. M. Eakin, O. Hoegh-Guldberg, R. P. Kelly, H. O. Portner, A. D. Rogers,  
459 J. M. Baxter, D. Laffoley, D. Osborn, A. Rankovic, J. Rochette, U. R. Sumaila, S. Treyer, C.  
460 Turley, Contrasting futures for ocean and society from different anthropogenic CO<sub>2</sub> emissions  
461 scenarios. *Science*. **349**, aac4722 (2015).
- 462 5. D. L. Breitburg, J. Salisbury, J. Bernhard, W.-J. Cai, S. Dupont, S. Doney, K. Kroeker, L. Levin,  
463 W. C. Long, L. Milke, S. Miller, B. Phelan, U. Passow, B. Seibel, A. Todgham, A. Tarrant, And

- 464 on top of all that... Coping with ocean acidification in the midst of many stressors.  
465 *Oceanography*. **28**, 48–61 (2015).
- 466 6. K. J. Kroeker, R. L. Kordas, R. Crim, I. E. Hendriks, L. Ramajo, G. S. Singh, C. M. Duarte, J.-P.  
467 Gattuso, Impacts of ocean acidification on marine organisms: quantifying sensitivities and  
468 interaction with warming. *Glob. Change Biol.* **19**, 1884–1896 (2013).
- 469 7. K. J. Kroeker, E. Sanford, J. M. Rose, C. A. Blanchette, F. Chan, F. P. Chavez, B. Gaylord, B.  
470 Helmuth, T. M. Hill, G. E. Hofmann, M. A. McManus, B. A. Menge, K. J. Nielsen, P. T.  
471 Raimondi, A. D. Russell, L. Washburn, Interacting environmental mosaics drive geographic  
472 variation in mussel performance and predation vulnerability. *Ecol. Lett.* **19**, 771–779 (2016).
- 473 8. P. Calosi, S. Melatunan, L. M. Turner, Y. Artioli, R. L. Davidson, J. J. Byrne, M. R. Viant, S.  
474 Widdicombe, S. D. Rundle, Regional adaptation defines sensitivity to future ocean acidification.  
475 *Nat. Commun.* **8**, 13994 (2017).
- 476 9. C. A. Vargas, N. A. Lagos, M. A. Lardies, C. Duarte, P. H. Manríquez, V. M. Aguilera, B.  
477 Broitman, S. Widdicombe, S. Dupont, Species-specific responses to ocean acidification should  
478 account for local adaptation and adaptive plasticity. *Nat. Ecol. Evol.* **1**, 0084 (2017).
- 479 10. L. S. Peck, *Oceanogr. Mar. Biol.*, in press.
- 480 11. G. V. Ashton, S. A. Morley, D. K. A. Barnes, M. S. Clark, L. S. Peck, Warming by 1°C drives  
481 species and assemblage level responses in Antarctica’s marine shallows. *Curr. Biol.* **27**, 2698–  
482 2705.e3 (2017).
- 483 12. L. S. Peck, M. S. Clark, D. Power, J. Reis, F. M. Batista, E. M. Harper, Acidification effects on  
484 biofouling communities: winners and losers. *Glob. Change Biol.* **21**, 1907–1913 (2015).
- 485 13. S.-A. Watson, S. A. Morley, L. S. Peck, Latitudinal trends in shell production cost from the  
486 tropics to the poles. *Sci. Adv.* **3**, e1701362 (2017).

- 487 14. M. S. Clark, U. Sommer, J. K. Sihra, M. A. S. Thorne, S. A. Morley, M. King, M. R. Viant, L. S.  
488 Peck, Biodiversity in marine invertebrate responses to acute warming revealed by a comparative  
489 multi-omics approach. *Glob. Change Biol.* **23**, 318–330 (2017).
- 490 15. P. J. Durack, S. E. Wijffels, R. J. Matear, Ocean salinities reveal strong global water cycle  
491 intensification during 1950 to 2000. *Science*. **336**, 455–458 (2012).
- 492 16. B. Kirtman, S. B. Power, J. A. Adedoyin, G. J. Boer, R. Bojariu, I. Camilloni, F. J. Doblas-Reyes,  
493 A. M. Fiore, M. Kimoto, G. A. Meehl, M. Prather, A. Sarr, C. Schär, R. Sutton, G. J. van  
494 Oldenborgh, G. Vecchi, H. J. Wang, in *Climate Change 2013: The Physical Science Basis.*  
495 *Contribution of Working Group I to the Fifth Assessment Report of the Intergovernmental Panel*  
496 *on Climate Change*, T. F. Stocker, D. Qin, G.-K. Plattner, M. Tignor, S. K. Allen, J. Boschung, A.  
497 Nauels, Y. Xia, V. Bex, P. M. Midgley, Eds. (Cambridge University Press, Cambridge, UK,  
498 2013), pp. 953–1028.
- 499 17. FAO, “FAO Yearbook. Fishery and Aquaculture Statistics. 2015” (Rome, 2017), (available at  
500 <http://www.fao.org/documents/card/en/c/68440a7a-2adb-416d-872b-b233eb44f6c9/>).
- 501 18. L. Telesca, K. Michalek, T. Sanders, L. S. Peck, J. Thyrring, E. M. Harper, Blue mussel shell  
502 shape plasticity and natural environments: a quantitative approach. *Sci. Rep.* **8**, 2865 (2018).
- 503 19. J. Thyrring, M. Blicher, J. Sørensen, S. Wegeberg, M. Sejr, Rising air temperatures will increase  
504 intertidal mussel abundance in the Arctic. *Mar. Ecol. Prog. Ser.* **584**, 91–104 (2017).
- 505 20. J. Thomsen, L. S. Stapp, K. Haynert, H. Schade, M. Danelli, G. Lannig, K. M. Wegner, F.  
506 Melzner, Naturally acidified habitat selects for ocean acidification–tolerant mussels. *Sci. Adv.* **3**,  
507 e1602411 (2017).
- 508 21. E. M. Harper, The molluscan periostracum: an important constraint in bivalve evolution.  
509 *Palaeontology*. **40**, 71–97 (1997).

- 510 22. A. G. Checa, C. M. Pina, A. J. Osuna-Mascaró, A. B. Rodríguez-Navarro, E. M. Harper,  
511 Crystalline organization of the fibrous prismatic calcitic layer of the Mediterranean mussel  
512 *Mytilus galloprovincialis*. *Eur. J. Mineral.* **26**, 495–505 (2014).
- 513 23. S. C. Fitzer, W. Zhu, K. E. Tanner, V. R. Phoenix, N. A. Kamenos, M. Cusack, Ocean  
514 acidification alters the material properties of *Mytilus edulis* shells. *J. R. Soc. Interface.* **12**,  
515 20141227 (2015).
- 516 24. J. Thomsen, I. Casties, C. Pansch, A. Körtzinger, F. Melzner, Food availability outweighs ocean  
517 acidification effects in juvenile *Mytilus edulis*: laboratory and field experiments. *Glob. Change*  
518 *Biol.* **19**, 1017–1027 (2013).
- 519 25. J. Thomsen, K. Ramesh, T. Sanders, M. Bleich, F. Melzner, Calcification in a marginal sea –  
520 influence of seawater [Ca<sup>2+</sup>] and carbonate chemistry on bivalve shell formation. *Biogeosciences*.  
521 **15**, 1469–1482 (2018).
- 522 26. S.-A. Watson, L. S. Peck, P. A. Tyler, P. C. Southgate, K. S. Tan, R. W. Day, S. A. Morley,  
523 Marine invertebrate skeleton size varies with latitude, temperature and carbonate saturation:  
524 implications for global change and ocean acidification. *Glob. Change Biol.* **18**, 3026–3038  
525 (2012).
- 526 27. E. M. Harper, L. S. Peck, Latitudinal and depth gradients in marine predation pressure. *Glob.*  
527 *Ecol. Biogeogr.* **25**, 670–678 (2016).
- 528 28. L. S. Peck, A cold limit to adaptation in the sea. *Trends Ecol. Evol.* **31**, 13–26 (2016).
- 529 29. H. A. Lowenstam, Factors affecting the aragonite:calcite ratios in carbonate-secreting marine  
530 organisms. *J. Geol.* **62**, 284–322 (1954).
- 531 30. J. G. Carter, R. Seed, in *Bivalves: an Eon of Evolution*, P. A. Johnston, J. W. Haggart, Eds.  
532 (University of Calgary Press, Vancouver, 1998), pp. 87–117.



- 533 31. L. Ramajo, A. B. Rodriguez-Navarro, C. M. Duarte, M. A. Lardies, N. A. Lagos, Shifts in shell  
534 mineralogy and metabolism of *Concholepas concholepas* juveniles along the Chilean coast. *Mar.*  
535 *Freshw. Res.* **66**, 1147 (2015).
- 536 32. V. L. Peck, G. A. Tarling, C. Manno, E. M. Harper, E. Tynan, Outer organic layer and internal  
537 repair mechanism protects pteropod *Limacina helicina* from ocean acidification. *Deep-Sea Res.*  
538 *Pt. II.* **127**, 41–52 (2016).
- 539 33. V. Tunnicliffe, K. T. A. Davies, D. A. Butterfield, R. W. Embley, J. M. Rose, W. W. Chadwick  
540 Jr, Survival of mussels in extremely acidic waters on a submarine volcano. *Nat. Geosci.* **2**, 344–  
541 348 (2009).
- 542 34. K. K. Kjeldsen, N. J. Korsgaard, A. A. Bjørk, S. A. Khan, J. E. Box, S. Funder, N. K. Larsen, J.  
543 L. Bamber, W. Colgan, M. van den Broeke, M.-L. Siggaard-Andersen, C. Nuth, A. Schomacker,  
544 C. S. Andresen, E. Willerslev, K. H. Kjær, Spatial and temporal distribution of mass loss from the  
545 Greenland Ice Sheet since AD 1900. *Nature.* **528**, 396–400 (2015).
- 546 35. L. Meire, J. Mortensen, P. Meire, T. Juul-Pedersen, M. K. Sejr, S. Rysgaard, R. Nygaard, P.  
547 Huybrechts, F. J. R. Meysman, Marine-terminating glaciers sustain high productivity in  
548 Greenland fjords. *Glob. Change Biol.* **23**, 5344–5357 (2017).
- 549 36. U. Gräwe, R. Friedland, H. Burchard, The future of the western Baltic Sea: two possible  
550 scenarios. *Ocean Dyn.* **63**, 901–921 (2013).
- 551 37. S. Dutkiewicz, J. J. Morris, M. J. Follows, J. Scott, O. Levitan, S. T. Dyhrman, I. Berman-Frank,  
552 Impact of ocean acidification on the structure of future phytoplankton communities. *Nat. Clim.*  
553 *Change.* **5**, 1002–1006 (2015).
- 554 38. J. García Molinos, B. S. Halpern, D. S. Schoeman, C. J. Brown, W. Kiessling, P. J. Moore, J. M.  
555 Pandolfi, E. S. Poloczanska, A. J. Richardson, M. T. Burrows, Climate velocity and the future

- 556 global redistribution of marine biodiversity. *Nat. Clim. Change*. **6**, 83–88 (2016).
- 557 39. A. F. Zuur, E. N. Ieno, C. S. Elphick, A protocol for data exploration to avoid common statistical  
558 problems. *Methods Ecol. Evol.* **1**, 3–14 (2010).
- 559 40. M. H. Graham, Confronting multicollinearity in ecological multiple regression. *Ecology*. **84**,  
560 2809–2815 (2003).
- 561 41. K. P. Burnham, D. R. Anderson, *Model Selection and Multimodel Inference : a Practical*  
562 *Information-Theoretic Approach* (Springer-Verlag, New York, NY, USA, 2002).
- 563 42. C. M. Zaremba, D. E. Morse, S. Mann, P. K. Hansma, G. D. Stucky, Aragonite–hydroxyapatite  
564 conversion in gastropod (Abalone) nacre. *Chem. Mater.* **10**, 3813–3824 (1998).
- 565 43. T. Kijewski, B. Śmietanka, M. Zbawicka, E. Gosling, H. Hummel, R. Wenne, Distribution of  
566 *Mytilus* taxa in European coastal areas as inferred from molecular markers. *J. Sea Res.* **65**, 224–  
567 234 (2011).
- 568 44. N. Bierne, P. Borsa, C. Daguin, D. Jollivet, F. Viard, F. Bonhomme, P. David, Introgression  
569 patterns in the mosaic hybrid zone between *Mytilus edulis* and *M. galloprovincialis*. *Mol. Ecol.*  
570 **12**, 447–461 (2003).
- 571 45. T. Hilbish, E. Carson, J. Plante, L. Weaver, M. Gilg, Distribution of *Mytilus edulis*, *M.*  
572 *galloprovincialis*, and their hybrids in open-coast populations of mussels in southwestern  
573 England. *Mar. Biol.* **140**, 137–142 (2002).
- 574 46. T. Kijewski, J. W. M. Wijsman, H. Hummel, R. Wenne, Genetic composition of cultured and  
575 wild mussels *Mytilus* from The Netherlands and transfers from Ireland and Great Britain.  
576 *Aquaculture*. **287**, 292–296 (2009).
- 577 47. H. Stuckas, L. Knöbel, H. Schade, C. Breusing, H.-H. Hinrichsen, M. Bartel, K. Langguth, F.  
578 Melzner, Combining hydrodynamic modelling with genetics: can passive larval drift shape the

- 579 genetic structure of Baltic *Mytilus* populations? *Mol. Ecol.* **26**, 2765–2782 (2017).
- 580 48. T. K. Kijewski, M. Zbawicka, R. Väinölä, R. Wenne, Introgression and mitochondrial DNA  
581 heteroplasmy in the Baltic populations of mussels *Mytilus trossulus* and *M. edulis*. *Mar. Biol.*  
582 **149**, 1371–1385 (2006).
- 583 49. H. Stuckas, K. Stoof, H. Quesada, R. Tiedemann, Evolutionary implications of discordant clines  
584 across the Baltic *Mytilus* hybrid zone (*Mytilus edulis* and *Mytilus trossulus*). *Heredity (Edinb)*.  
585 **103**, 146–156 (2009).
- 586 50. C. Breusing, *Population Genetics and Morphometric Variation of Blue Mussels in the Western*  
587 *Baltic Sea*. (Master Thesis. GEOMAR Helmholtz Centre for Ocean Research Kiel, 2012;  
588 <http://oceanrep.geomar.de/19887/>).
- 589 51. R. Väinölä, P. Strelkov, *Mytilus trossulus* in Northern Europe. *Mar. Biol.* **158**, 817–833 (2011).
- 590 52. T. Yarra, K. Gharbi, M. Blaxter, L. S. Peck, M. S. Clark, Characterization of the mantle  
591 transcriptome in bivalves: *Pecten maximus*, *Mytilus edulis* and *Crassostrea gigas*. *Mar. Genom.*  
592 **27**, 9–15 (2016).
- 593 53. H. Tyler-Walters, B. James, M. Carruthers, C. Wilding, O. Durkin, C. Lacey, E. Philpott, L.  
594 Adamas, P. D. Chaniotis, P. T. V. Wilkes, R. Seeley, M. Neilly, J. Dargie, O. T. Crawford-Avis,  
595 “Descriptions of scottish Priority Marine Features (PMFs). Scottish Natural Heritage  
596 commissioned report No. 406.” (2016).
- 597 54. S. J. Brooks, E. Farmen, The distribution of the mussel *Mytilus* species along the Norwegian  
598 coast. *J. Shellfish Res.* **32**, 265–270 (2013).
- 599 55. S. S. Mathiesen, J. Thyrring, J. Hemmer-Hansen, J. Berge, A. Sukhotin, P. Leopold, M. Bekaert,  
600 M. K. Sejr, E. E. Nielsen, Genetic diversity and connectivity within *Mytilus* spp. in the subarctic  
601 and Arctic. *Evol. Appl.* **10**, 39–55 (2017).

- 602 56. R Core Team, R: a language and environment for statistical computing. (2017), (available at  
603 <https://www.r-project.org/>).
- 604 57. F. Cribari-Neto, A. Zeileis, Beta regression in R. *J. Stat. Softw.* **34**, 1–24 (2010).
- 605 58. J. Fox, S. Weisberg, *An R Companion to Applied Regression* (SAGE Publications, Thousand  
606 Oaks, CA, USA, 2011; [https://uk.sagepub.com/en-gb/eur/an-r-companion-to-applied-](https://uk.sagepub.com/en-gb/eur/an-r-companion-to-applied-regression/book233899)  
607 [regression/book233899](https://uk.sagepub.com/en-gb/eur/an-r-companion-to-applied-regression/book233899)).
- 608 59. H. Wickham, *Ggplot2 : Elegant Graphics for Data Analysis* (Springer, New York, NY, USA,  
609 2016).
- 610 60. D. Bates, M. Mächler, B. Bolker, S. Walker, Fitting linear mixed-effects models using lme4. *J.*  
611 *Stat. Softw.* **67**, 1–48 (2015).
- 612 61. A. Loy, S. Steele, lmeresampler: bootstrap methods for nested linear mixed-effects models.  
613 (2016), (available at <https://cran.r-project.org/package=lmeresampler>).
- 614 62. A. Kuznetsova, P. B. Brockhoff, R. H. B. Christensen, lmerTest package: tests in linear mixed  
615 effects models. *J. Stat. Softw.* **82**, 1–26 (2017).
- 616 63. K. Barton, MuMIn: Multi-Model Inference. (2017), (available at [https://cran.r-](https://cran.r-project.org/package=MUMIn)  
617 [project.org/package=MUMIn](https://cran.r-project.org/package=MUMIn)).
- 618 64. J. Pinheiro, D. Bates, *Mixed-Effects Models in S and S-PLUS* (Springer-Verlag, New York, USA,  
619 2000), *Statistics and Computing*.
- 620 65. U. Halekoh, S. Højsgaard, A Kenward-Roger approximation and parametric bootstrap methods  
621 for tests in linear mixed models - The R package pbkrtest. *J. Stat. Softw.* **59**, 1–32 (2014).
- 622 66. F. Scheipl, S. Greven, H. Küchenhoff, Size and power of tests for a zero random effect variance  
623 or polynomial regression in additive and linear mixed models. *Comput. Stat. Data Anal.* **52**,  
624 3283–3299 (2008).

- 625 67. P. J. Haines, *Principles of Thermal Analysis and Calorimetry* (Royal Society of Chemistry,  
626 Cambridge, UK, 2002; <http://ebook.rsc.org/?DOI=10.1039/9781847551764>), *RSC Paperbacks*.
- 627 68. S. Gaisford, V. Kett, P. J. Haines, *Principles of Thermal Analysis and Calorimetry: Edition 2*  
628 (Royal Society of Chemistry, Cambridge, UK, 2016; <http://pubs.rsc.org/en/content/ebook/978-1-78262-051-8#!divbookcontent>).

630

631 **Acknowledgments:** We thank Iain Johnston (Scottish Oceans Institute, St. Andrews, UK), Sarah  
632 Dashfield (Plymouth Marine Laboratory, Plymouth, UK), Dr. Peter Thor (Norwegian Polar  
633 Institute, Tromsø, Norway), Alexander Ventura (University of Gothenburg, Kristineberg,  
634 Sweden), Dr. Henk van der Veer and Rob Dekker (Royal Netherlands Institute for Sea Research,  
635 Texel, Netherlands) for help with specimens collection, and the Statistics Clinic (University of  
636 Cambridge, UK) for statistical advice.

637 **Funding:** The work was funded by the European Union Seventh Framework Programme, Marie Curie  
638 ITN Calcium in a Changing Environment (CACHE), under grant agreement n° 605051. JT  
639 acknowledges additional financial support from the Danish Council for Independent Research,  
640 Individual Post-doctoral Grant n° 7027-0060B.

641 **Author contributions:** L.T., L.S.P. and E.M.H. conceived the original project and designed the study;  
642 L.T. performed laboratory work and thermogravimetric analysis, generated environmental  
643 datasets, performed modelling work and analysed output data; L.T., T.S., J.T. and M.K.S. collected  
644 materials; L.T., L.S.P. and E.M.H. wrote the first draft of the manuscript, and all co-authors  
645 contributed substantially to revisions.

646

647 **FIGURES AND TABLES**

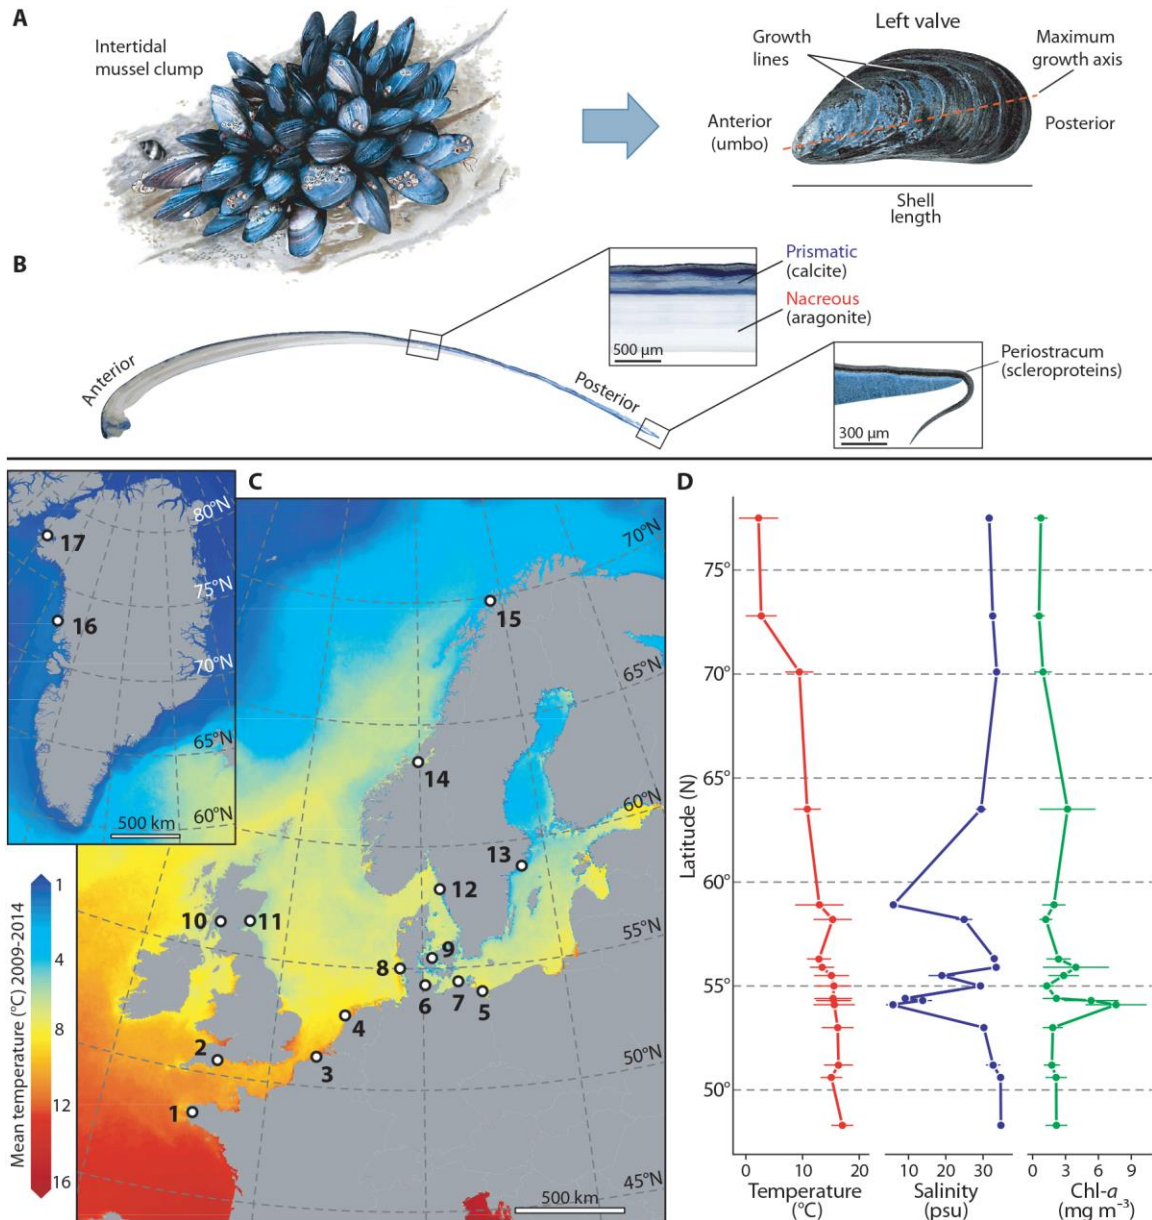

648

649

650

651

652

653

**Fig. 1. *Mytilus* spp. shell, collection sites and environmental heterogeneity. (A) *Mytilus* shell valve morphology and dimensions. (B) Anteroposterior cross-section of shell valve along the axis of maximum growth (from umbo to posterior commissure) showing internal structure and composition of individual mineral (prismatic and nacreous) and organic (periostracum) shell layers. (C) Thermal map of North-East Atlantic and Arctic surface**



654 waters from the CMEMS (<http://marine.copernicus.eu/>) biogeochemical datasets showing  
655 locations (open circles) where *Mytilus* was collected from across the Eastern European and  
656 Greenlandic coastlines (from 48°N to 78°N): (1) Brest, France, (2) Exmouth, England, (3)  
657 Oostende, Belgium, (4) Texel, Netherlands, (5) Usedom, (6) Kiel, (7) Ahrenshoop, (8) Sylt,  
658 all Germany, (9) Kerteminde, Denmark, (10) Tarbet, Scotland, (11) St. Andrews, Scotland,  
659 (12) Kristineberg, Sweden, (13) Nynäshamn, Sweden (14) Trondhiem, Norway, (15)  
660 Tromsø, Norway, (16) Upernavik, Greenland and (17) Qaanaaq, Greenland. Map created  
661 with ArcMap 10.5 (ArcGIS software by Esri, <http://esri.com>), background image courtesy  
662 of OpenStreetMap (<http://www.openstreetmap.org>). (D) Latitudinal gradients for sea  
663 surface temperature, salinity and chlorophyll-*a* (Chl-*a*) concentration, showing  
664 environmental heterogeneity across the study regions. Mean values (May - October, filled  
665 circles) and SD (horizontal lines) for the 6-year period 2009 - 2014 were estimated from  
666 CMEMS datasets.

667

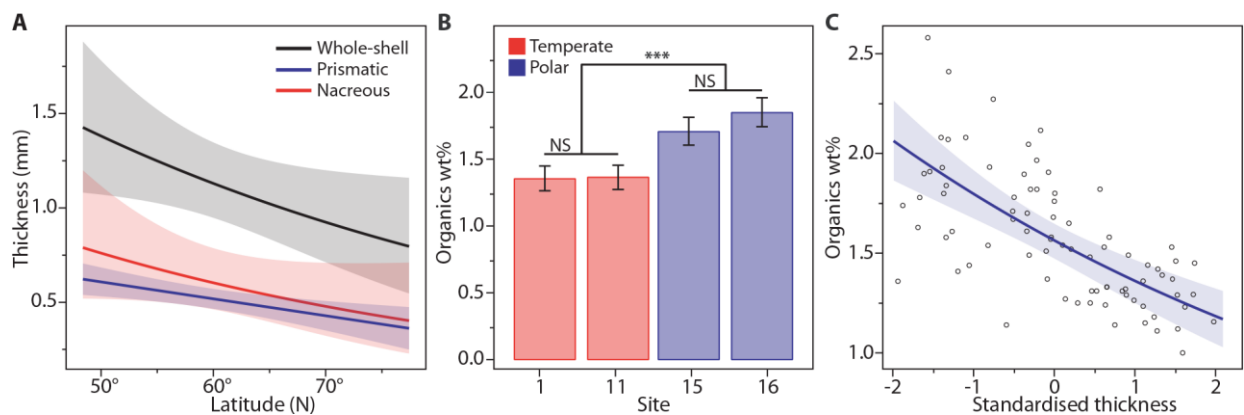

668

669 **Fig. 2. Latitudinal patterns of shell thickness, organic content and calcification. (A)**

670 Relationships between the thickness of whole-shell (black), prismatic (blue) and nacreous

671 (red) layers and latitude. Whole-shell thickness decreased poleward (95% CI = -0.36 to -

672 0.01,  $cR^2 = 0.81$ ). The prismatic layer was significantly related to latitude (95% CI = 4.70

673 to 5.73,  $cR^2 = 0.72$ ). Predicted values (continuous lines) and confidence intervals (shaded  
674 areas) were estimated for mussels of mean shell length (47.42 mm). Parameters'  
675 significance is determined when the bootstrapped 95% CI does not include zero. **(B)**  
676 Variations in organic content among shells from temperate (sites 1, 11, white bars) and  
677 polar (sites 15, 16, grey bars) climates. Pair-wise contrasts indicated significantly higher  
678 proportions of organics in high-latitude than low-latitude specimens [mean difference =  
679 0.44%;  $z = 8.27$ ,  $P < 0.0001$  (\*\*\*)],  $\text{pseudo}R^2 = 0.49$ ], in addition to non-significant  
680 differences (NS) among temperate (mean difference = 0.002%;  $z = 0.12$ ,  $P = 0.91$ ) and  
681 polar (mean difference = 0.13%,  $z = 1.86$ ,  $P = 0.063$ ) populations. **(C)** Relationship  
682 between the proportion of organics and standardised thickness of the prismatic [mean (SD)  
683 = 529  $\mu\text{m}$  (174)] (sites 1, 7, 10 and 11), indicating a negative association between layer  
684 thickness and calcification level ( $z = -7.10$ ,  $P < 0.0001$ ,  $\text{pseudo}R^2 = 0.40$ ).  
685



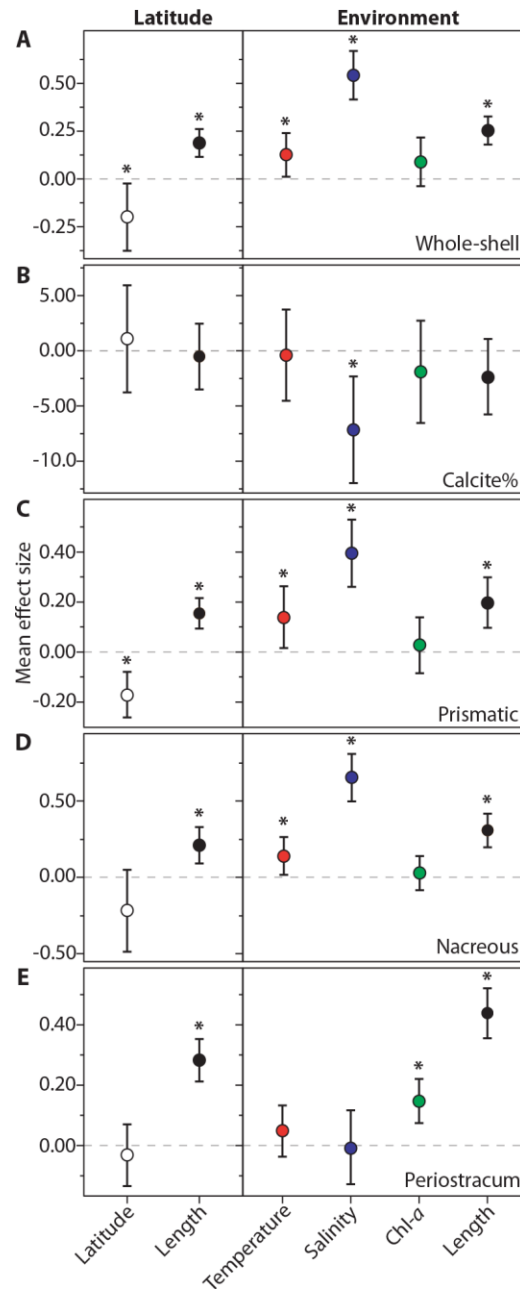

686

687

688

689

690

691

692

**Fig. 3. Mean effect size of predictors on *Mytilus* shell measurements.** Effect sizes were estimated from individual latitudinal (left panels) and environmental (right panels) GLMMs. Mean effect sizes and direction of impacts of latitude (white), shell length (black), sea surface temperature (red), salinity (blue) and Chl-*a* concentration (green) on layer In-thickness ( $\mu\text{m}$ ) measurements and calcite% are reported: (A) whole-shell, (B) calcite%, (C) prismatic layer, (D) nacreous layer and (E) periostracum. Note the different

693 scales on the y-axis to highlight variations among layers. Significance of regression  
694 parameters is determined when the bootstrapped 95% CI (error bars) does not cross zero  
695 (\* denotes a significant difference from zero).

696

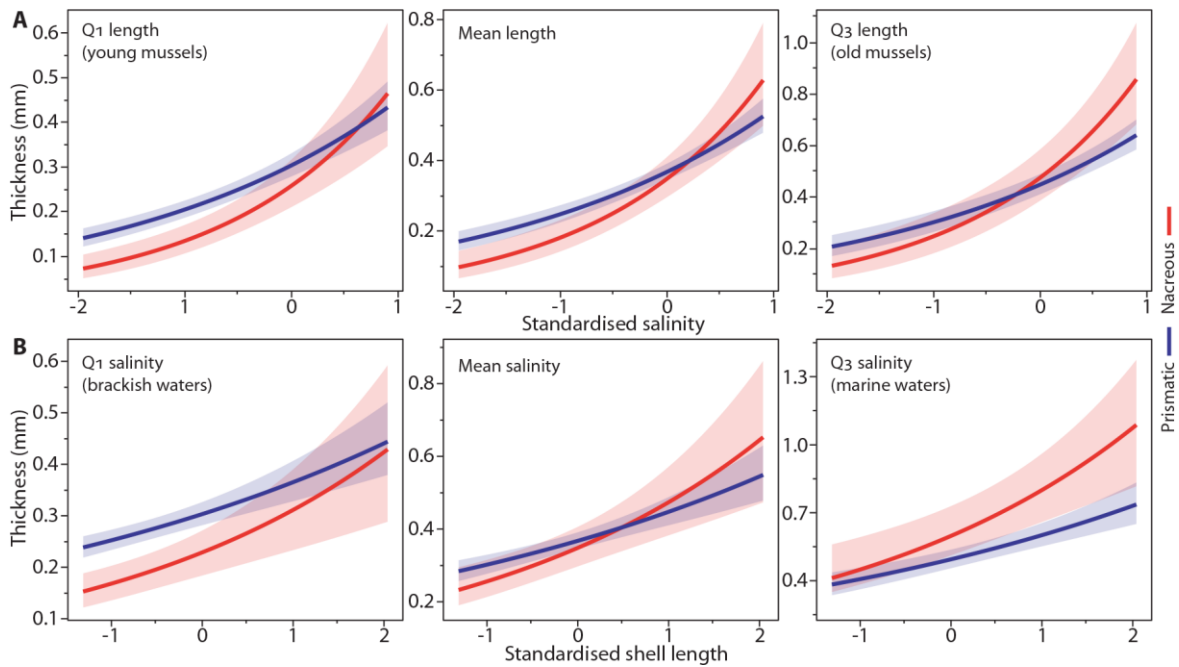

697

698 **Fig. 4. Environmental influence on shell production and composition.** Predicted relationships  
699 between thickness of prismatic (blue) and nacreous (red) layers, and standardised salinity  
700 [mean (SD) = 25.52 psu (10.29)], shell length [mean (SD) = 47.42 mm (16.20)] and their  
701 interactions. **(A)** Shell thickness is modelled as a function of salinity for the 1st quartile  
702 ( $Q_1 = 31.50$  mm), mean value (47.42 mm) and 3rd quartile ( $Q_3 = 63.90$  mm) of the shell  
703 lengths sampled. For medium-sized mussels, we detected a decreasing proportion of the  
704 calcitic component with increasing salinity and the deposition of relatively thicker  
705 aragonitic layers at salinities  $> 27.67$  psu. **(B)** Thickness is modelled as a function of length  
706 for the 1st quartile ( $Q_1 = 18.92$  psu), mean value (25.52 psu) and 3rd quartile ( $Q_3 = 33.13$   
707 psu) of salinity. At mean salinity, we detected an inversion of the relative layers' thickness

708 for shell length > 55.30 mm. Across the entire range of shell lengths, the model predicts  
709 formation of calcite- and nacreous-dominated shells under low- and high-salinities,  
710 respectively. Mean values (continuous lines) and confidence intervals (shaded areas) are  
711 predicted controlling for temperature (13.03°C) and Chl-*a* (2.48 mg m<sup>-3</sup>).

712

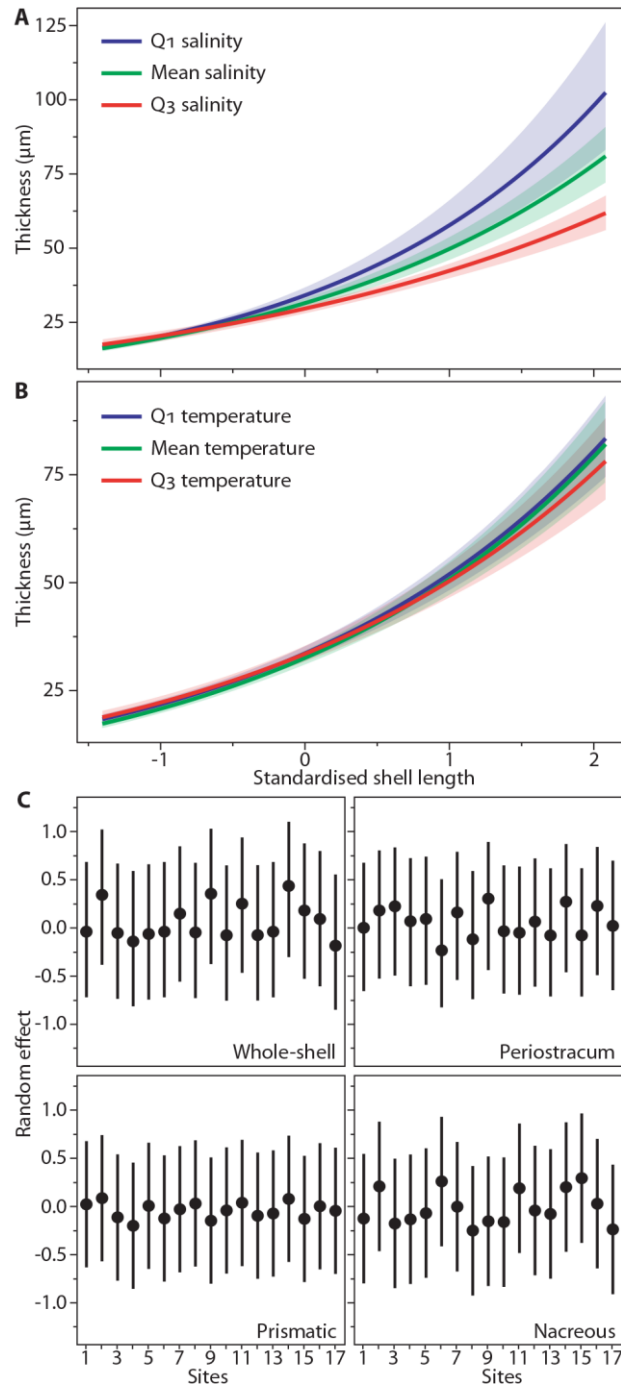

713

714

715

716

**Fig. 5. Periostracum plasticity and among-site shell variation.** Interacting effects of salinity, temperature and shell length on shell periostracum. (A) Periostracum thickness is modelled as a function of shell length [mean (SD) = 47.42 mm (16.20)] for the 1st

717 quartile ( $Q_1 = 18.92$  psu, blue line), mean (25.52 psu, black line) and 3rd quartile ( $Q_3 =$   
 718 33.13 psu, red line) of water salinity. Predicted values (continuous lines) and confidence  
 719 intervals (shaded areas) indicate higher rates of exponential periostracal thickening with  
 720 decreasing salinity. Smaller individuals (shell length < 48.38 mm) were characterized by  
 721 non-significant thickness differences under different salinity regimes. **(B)** Thickness is  
 722 modelled for the 1st quartile ( $Q_1 = 12.89^\circ\text{C}$ , blue line), mean ( $13.03^\circ\text{C}$ , black line) and  
 723 3rd quartile ( $Q_3 = 15.51^\circ\text{C}$ , red line) of water temperature. Predicted values indicate a  
 724 marginal influence of temperature on periostracal thickening. **(C)** GLMMs' conditional  
 725 modes (filled circles) and variances (continuous lines) of the random effect estimated for  
 726 individual shell layers. Modes represent the difference between the average predicted  
 727 response (layer thickness) for a given set of fixed-effects values (mean environmental  
 728 covariates and shell length) and the response predicted at a particular site. These indicate  
 729 no detectable residual effect of species (*Mytilus edulis* or *M. trossulus*) and level of  
 730 hybridization on shell thickness for each site.

731

732 **Table 1. Environmental GLMMs summary.** Estimated statistics and bootstrapped 95% CIs for  
 733 regression parameters are reported for the modelled relationships between individual  
 734 shell thickness measurements and standardised covariates. For the summary of model in  
 735 equation (1), the prismatic layer, Layer(Pr), is used as the reference level, (Intercept).  
 736 (Parameters' significance is determined when the 95% CI does not include zero).

|                     | Estimate | SE    | 95% CI       | <i>t</i> -value | <i>P</i> -value<br>(approximate) |
|---------------------|----------|-------|--------------|-----------------|----------------------------------|
| <b>Whole-shell*</b> |          |       |              |                 |                                  |
| (Intercept)         | 6.617    | 0.051 | 6.517; 6.717 | 128.71          | <0.0001                          |

|                                                       |        |       |                |        |         |
|-------------------------------------------------------|--------|-------|----------------|--------|---------|
| Temperature                                           | 0.156  | 0.054 | 0.014; 0.240   | 2.89   | 0.013   |
| Salinity                                              | 0.525  | 0.060 | 0.411; 0.672   | 8.69   | <0.0001 |
| Chl- <i>a</i>                                         | 0.074  | 0.054 | -0.042; 0.216  | 1.37   | 0.20    |
| Length                                                | 0.248  | 0.037 | 0.181; 0.327   | 6.44   | <0.0001 |
| <b>Prismatic (Pr) &amp; nacreous (Na)<sup>†</sup></b> |        |       |                |        |         |
| (Intercept)                                           | 5.907  | 0.031 | 5.774; 6.036   | 188.31 | <0.0001 |
| Temperature                                           | 0.138  | 0.033 | 0.013; 0.260   | 4.17   | 0.0011  |
| Salinity                                              | 0.396  | 0.039 | 0.264; 0.531   | 10.22  | <0.0001 |
| Chl- <i>a</i>                                         | 0.028  | 0.033 | -0.087; 0.139  | 0.86   | 0.41    |
| Length                                                | 0.197  | 0.031 | 0.096; 0.297   | 6.39   | <0.0001 |
| Layer(Na)                                             | -0.054 | 0.078 | -0.247; 0.134  | -0.70  | 0.49    |
| Salinity ×<br>Layer(Na)                               | 0.259  | 0.088 | 0.065; 0.443   | 2.95   | 0.0033  |
| Length ×<br>Layer(Na)                                 | 0.111  | 0.067 | -0.036; 0.258  | 1.66   | 0.096   |
| <b>Periostracum<sup>‡</sup></b>                       |        |       |                |        |         |
| (Intercept)                                           | 3.500  | 0.048 | 3.406; 3.596   | 71.03  | <0.0001 |
| Temperature                                           | 0.049  | 0.043 | -0.036; 0.134  | 1.12   | 0.28    |
| Salinity                                              | -0.009 | 0.061 | -0.131; 0.111  | -0.14  | 0.89    |
| Chl- <i>a</i>                                         | 0.147  | 0.038 | 0.071; 0.221   | 3.88   | 0.0020  |
| Length                                                | 0.439  | 0.041 | 0.357; 0.522   | 10.25  | <0.0001 |
| Temperature ×<br>Length                               | -0.064 | 0.035 | -0.135; 0.006  | -1.77  | 0.082   |
| Salinity ×<br>Length                                  | -0.151 | 0.061 | -0.271; -0.029 | -2.38  | 0.020   |

737 \* Whole-shell, the random intercept was normally distributed with mean of 0 and variance 0.209<sup>2</sup>.

738 † Prismatic and nacreous layer, the random intercepts were normally distributed with mean 0, and  
739 variances 0.123<sup>2</sup> and 0.310<sup>2</sup>, respectively.

740 ‡ Periostracum, the random intercept was normally distributed with mean 0 and variance 0.130<sup>2</sup>.

741

742 **SUPPLEMENTARY MATERIALS**

743

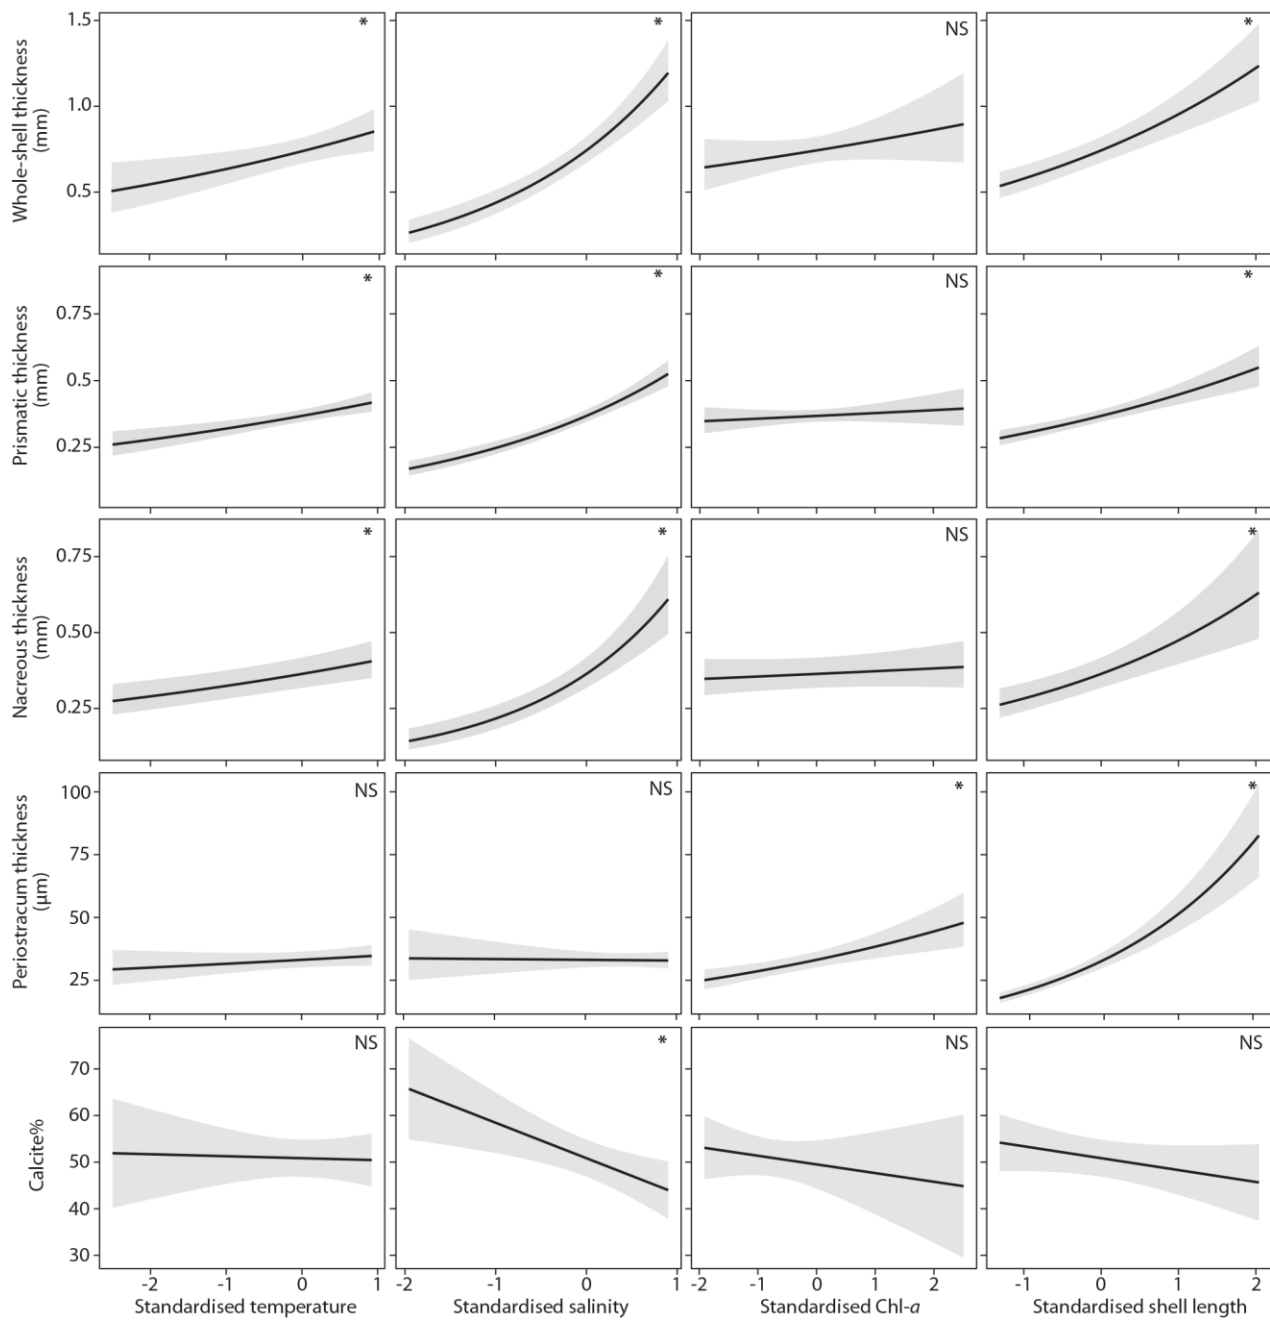

744

745

746

747

**fig. S1. Relationships between shell layers and modelled predictors.** Predicted relationships between the whole-shell, prismatic layer, nacreous layer, periostracum thickness and the calcite% with standardised water temperature [mean (SD) = 13.03°C (4.32)], salinity [mean (SD)

748 = 25.52 psu (10.29)], Chl-*a* concentration [mean (SD) = 2.48 mg m<sup>-3</sup> (1.41)], and shell length  
749 [mean (SD) = 47.42 mm (16.20)]. Predicted values (continuous lines) and confidence intervals  
750 (shaded areas) across the range of each predictor were estimated controlling statistically for the  
751 other covariates (mean values). (NS  $P > 0.05$ , \*  $P < 0.05$ )

752

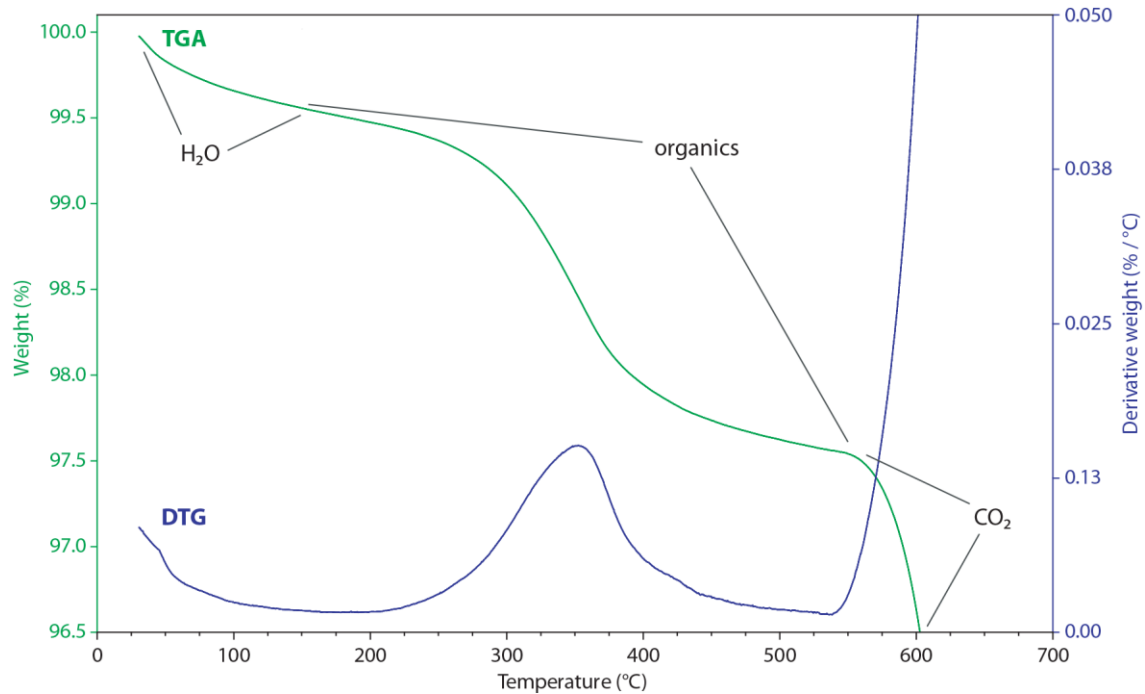

753

754 **fig. S2. Example of Thermogravimetric Analysis (TGA) and Derivative Thermogravimetry**  
755 **(DTG).** The TGA curve (green) represents the weight changes with increasing treatment  
756 temperature for the prismatic layer of *Mytilus edulis*. The sample was exposed to a constant  
757 heating, from ~25°C to 700°C at a linear rate of 10°C min<sup>-1</sup>. Three known regions of weight loss  
758 with increasing temperature are highlighted (42): i) the evaporation of physically adsorbed water  
759 at 30-150°C, ii) the degradation of organics at 150-550 °C, and iii) the rapid decomposition of  
760 calcium carbonate (CaCO<sub>3</sub>) into calcium oxide (CaO) and carbon dioxide (CO<sub>2</sub>) starting at  
761 ~550°C. The DTG line (blue) represents the derivative of the thermal curve and shows the rate of



762 weight loss during heating. The peak indicates the temperature at which the organic mass loss  
763 was fastest.

764

765 **table S1. Latitudinal GLMMs summary.** Estimated statistics and bootstrapped 95% CI for  
766 regression parameters are reported for the modelled relationships between individual shell  
767 measurements, standardised latitude and shell length.

| Measurement  | Fixed       | Estimate | SE    | 95%CI          | t-value | P-value<br>(approximate) | Random    | SD    |
|--------------|-------------|----------|-------|----------------|---------|--------------------------|-----------|-------|
|              | effects     |          |       |                |         |                          | effects   |       |
| Whole-shell  | (Intercept) | 7.036    | 0.089 | 6.863; 7.210   | 78.89   | <0.0001                  | Site      | 0.293 |
|              | Latitude    | -0.188   | 0.089 | -0.316; -0.011 | -2.10   | 0.067                    | Residuals | 0.192 |
|              | Length      | 0.188    | 0.036 | 0.115; 0.259   | 5.18    | <0.0001                  |           |       |
| Prismatic    | (Intercept) | 6.211    | 0.267 | 6.118; 6.302   | 133.06  | <0.0001                  | Site      | 0.867 |
|              | Latitude    | -0.839   | 0.268 | -1.373; -0.305 | -3.13   | 0.013                    | Residuals | 0.906 |
|              | Length      | -0.786   | 0.155 | 0.478; 1.106   | 4.83    | <0.0001                  |           |       |
| Nacreous     | (Intercept) | 6.410    | 0.135 | 6.148; 6.674   | 47.63   | <0.0001                  | Site      | 0.442 |
|              | Latitude    | -0.217   | 0.135 | -0.480; 0.050  | -1.61   | 0.14                     | Residuals | 0.321 |
|              | Length      | 0.210    | 0.060 | 0.089; 0.332   | 3.39    | 0.00088                  |           |       |
| Periostracum | (Intercept) | 3.709    | 0.053 | 3.605; 3.814   | 70.02   | <0.0001                  | Site      | 0.170 |
|              | Latitude    | -0.031   | 0.053 | -0.136; 0.073  | -0.59   | 0.58                     | Residuals | 0.224 |
|              | Length      | 0.283    | 0.035 | 0.213; 0.353   | 7.65    | <0.0001                  |           |       |
| Calcite%     | (Intercept) | 45.255   | 2.476 | 40.327; 50.134 | 18.28   | <0.0001                  | Site      | 8.019 |
|              | Latitude    | 1.097    | 2.484 | -3.718; 6.011  | 0.44    | 0.67                     | Residuals | 8.829 |
|              | Length      | -0.510   | 1.486 | -3.444; 2.515  | -0.33   | 0.75                     |           |       |

768 **table S2. Environmental GLMMs summary.** Estimated statistics and bootstrapped 95% CI for  
769 regression parameters are reported for the modelled relationships between individual shell  
770 measurements, standardised environmental covariates and shell length.

| Measurement | Fixed effects | Estimate | SE    | 95%CI        | t-     | P-value       | Random  | SD    |
|-------------|---------------|----------|-------|--------------|--------|---------------|---------|-------|
|             |               |          |       |              | value  | (approximate) | effects |       |
| Whole-shell | (Intercept)   | 6.617    | 0.051 | 6.517; 6.717 | 128.62 | <0.0001       | Site    | 0.209 |

|                |                         |        |       |                 |        |         |           |       |
|----------------|-------------------------|--------|-------|-----------------|--------|---------|-----------|-------|
|                | Temperature             | 0.156  | 0.054 | 0.014; 0.240    | 2.89   | 0.013   | Residual  | 0.188 |
|                | Salinity                | 0.525  | 0.060 | 0.411; 0.672    | 8.69   | <0.0001 |           |       |
|                | Chl- <i>a</i>           | 0.074  | 0.054 | -0.042; 0.216   | 1.37   | 0.20    |           |       |
|                | Length                  | 0.248  | 0.037 | 0.181; 0.327    | 6.44   | <0.0001 |           |       |
| Prismatic (Pr) | (Intercept)             | 5.907  | 0.031 | 5.774; 6.036    | 188.31 | <0.0001 | Site (Pr) | 0.123 |
| and nacreous   | Temperature             | 0.138  | 0.033 | 0.013; 0.260    | 4.17   | 0.0011  | Site (Na) | 0.310 |
| (Na)           | Salinity                | 0.396  | 0.039 | 0.264; 0.531    | 10.22  | <0.0001 | Residual  | 0.198 |
|                | Chl- <i>a</i>           | 0.028  | 0.033 | -0.087; 0.139   | 0.86   | 0.41    |           |       |
|                | Length                  | 0.197  | 0.031 | 0.096; 0.297    | 6.39   | <0.0001 |           |       |
|                | Layer(Na)               | -0.054 | 0.078 | -0.247; 0.134   | -0.70  | 0.49    |           |       |
|                | Salinity ×<br>Layer(Na) | 0.259  | 0.088 | 0.065; 0.443    | 2.95   | 0.0033  |           |       |
|                | Length ×<br>Layer(Na)   | 0.111  | 0.067 | -0.036; 0.258   | 1.66   | 0.096   |           |       |
| Periostracum   | (Intercept)             | 3.500  | 0.048 | 3.406; 3.596    | 71.03  | <0.0001 | Site      | 0.130 |
|                | Temperature             | 0.049  | 0.043 | -0.036; 0.134   | 1.12   | 0.28    | Residual  | 0.230 |
|                | Salinity                | -0.009 | 0.061 | -0.131; 0.111   | -0.14  | 0.89    |           |       |
|                | Chl- <i>a</i>           | 0.147  | 0.038 | 0.071; 0.221    | 3.88   | 0.002   |           |       |
|                | Length                  | 0.439  | 0.041 | 0.357; 0.522    | 10.25  | <0.0001 |           |       |
|                | Temperature ×<br>Length | -0.064 | 0.035 | -0.135; 0.006   | -1.77  | 0.082   |           |       |
|                | Salintiy ×<br>Length    | -0.151 | 0.061 | -0.271; -0.029  | -2.38  | 0.020   |           |       |
| Calcite%       | (Intercept)             | 51.092 | 1.903 | 47.338; 54.927  | 26.84  | <0.0001 | Site      | 7.605 |
|                | Temperature             | -4.003 | 2.112 | -4.508; 3.791   | -0.19  | 0.85    | Residual  | 9.656 |
|                | Salinity                | -7.163 | 2.476 | -12.025; -2.382 | -2.87  | 0.012   |           |       |
|                | Chl- <i>a</i>           | -1.908 | 2.392 | -6.662; 2.764   | -0.80  | 0.44    |           |       |
|                | Length                  | -2.404 | 1.690 | -5.807; 1.071   | -1.367 | 0.18    |           |       |

772

**table S3. Provenience and taxonomic status of the *Mytilus* populations used for the study.**

773

For each sampling site (site codes as in Fig. 1C), geographic location, samples size (*N*), site

774

coordinates (longitude and latitude), genotypic status [proportion of *Mytilus edulis* (Me), *M.*

775

*trossulus* (Mt), *M. galloprovincialis* (Mg) and hybrids] and reference and/or previous use of the

776

studied populations are reported.

| Site | Location              | <i>N</i> | Longitude  | Latitude   | Status of mussels            | Reference to taxonomic status of populations and/or previously published use of the shells |
|------|-----------------------|----------|------------|------------|------------------------------|--------------------------------------------------------------------------------------------|
| 1    | Brest (France)        | 25       | 4.369375°W | 48.338°N   | 96%Me,<br>4%Me×Mg            | Kijewski <i>et al.</i> (43); Bierne <i>et al.</i> (44)                                     |
| 2    | Exmouth (England, UK) | 26       | 3.429111°W | 50.622°N   | Me                           | Hilbish <i>et al.</i> (45); Annual monitoring 2015                                         |
| 3    | Oostende (Belgium)    | 25       | 2.904333°E | 51.23039°N | Me                           | Kijewski <i>et al.</i> (43, 46)                                                            |
| 4    | Texel (Netherlands)   | 25       | 4.796167°E | 53.00536°N | 94%Me,<br>6%Me×Mg            | Kijewski <i>et al.</i> (43, 46)                                                            |
| 5    | Usedom (Germany)      | 25       | 14.01103°E | 54.05561°N | 37%Me,<br>10%Mt,<br>53%Me×Mt | Stuckas <i>et al.</i> (47); Kijewski <i>et al.</i> (48)                                    |
| 6    | Kiel (Germany)        | 25       | 10.14889°E | 54.32919°N | 68%Me,<br>32%Me×Mt           | Stuckas <i>et al.</i> (47, 49); Breusing (50)                                              |
| 7    | Ahrenshoop (Germany)  | 25       | 12.42694°E | 54.38686°N | 80%Me,<br>20%Me×Mt           | Stuckas <i>et al.</i> (47, 49); Kijewski <i>et al.</i> (43)                                |
| 8    | Sylt (Germany)        | 25       | 8.435944°E | 55.02556°N | Me                           | Stuckas <i>et al.</i> (47, 49); Breusing (50); Väinölä & Strelkov (51); Bierne (44)        |
| 9    | Kerteminde (Denmark)  | 25       | 10.66797°E | 55.45125°N | 57%Me,<br>5%Mt,<br>38%Me×Mt  | Stuckas <i>et al.</i> (47); Kijewski <i>et al.</i> (48)                                    |

|    |                                  |    |            |            |                                             |                                                                                                                                       |
|----|----------------------------------|----|------------|------------|---------------------------------------------|---------------------------------------------------------------------------------------------------------------------------------------|
| 10 | Tarbet<br>(Scotland,<br>UK)      | 25 | 5.411333°W | 55.86556°N | Me                                          | Yarra <i>et al.</i> (52)                                                                                                              |
| 11 | St. Andrews<br>(Scotland,<br>UK) | 25 | 2.781472°W | 56.33961°N | Me                                          | Tyler-Walters <i>et al.</i> (53);<br>Annual MPA monitoring<br>(JCNN, SNH)                                                             |
| 12 | Kristineberg<br>(Sweden)         | 24 | 11.42208°E | 58.2105°N  | 94% Me,<br>6% Me×Mt                         | Stuckas <i>et al.</i> (47, 49);<br>Brooks & Farmed (54);<br>Breusing (50);<br>Kijewski <i>et al.</i> (43);<br>Väinölä & Strelkov (51) |
| 13 | Nynäshamn<br>(Sweden)            | 25 | 17.92928°E | 58.87736°N | Mt                                          | Stuckas <i>et al.</i> (47, 49);<br>Breusing (50);<br>Väinölä & Strelkov (51);<br>Kijewski <i>et al.</i> (43)                          |
| 14 | Trondheim<br>(Norway)            | 25 | 10.44789°E | 63.45719°N | 70% Me,<br>5% Mt,<br>25% Me×Mt,<br>5% Me×Mg | Brooks & Farmed (54);<br>Väinölä & Strelkov (51)                                                                                      |
| 15 | Tromsø<br>(Norway)               | 24 | 56.10281°W | 70.07467°N | Me                                          | Mathiesen <i>et al.</i> (55);<br>Brooks & Farmed (54);<br>Väinölä & Strelkov (51)                                                     |
| 16 | Upernavik<br>(Greenland)         | 25 | 56.10281°W | 72.79389°N | 33% Me,<br>51% Mt,<br>14% Me×Mt             | Mathiesen <i>et al.</i> (55)                                                                                                          |
| 17 | Qaanaaq<br>(Greenland)           | 25 | 69.24031°W | 77.465°N   | Mt                                          | Mathiesen <i>et al.</i> (55)                                                                                                          |

---

777

**table S4. Environmental covariates.** Summary statistics (mean value and SD) of environmental

778

conditions at each study site. Site codes as in Fig. 1C.

| Site | Temperature (SD)<br>(°C) | Salinity (SD)<br>(psu) | Chl- <i>a</i> (SD)<br>(mg m <sup>-3</sup> ) |
|------|--------------------------|------------------------|---------------------------------------------|
| 1    | 17.01 (1.94)             | 34.79 (0.33)           | 2.16 (1.00)                                 |
| 2    | 15.08 (1.92)             | 34.70 (0.39)           | 2.14 (0.98)                                 |
| 3    | 16.33 (2.55)             | 32.70 (1.92)           | 1.76 (0.75)                                 |
| 4    | 16.19 (2.82)             | 30.20 (2.28)           | 1.84 (0.93)                                 |
| 5    | 15.59 (3.67)             | 5.39 (1.45)            | 7.62 (3.02)                                 |
| 6    | 15.46 (3.11)             | 13.77 (2.54)           | 5.34 (7.10)                                 |
| 7    | 15.39 (3.34)             | 9.09 (1.24)            | 2.16 (1.25)                                 |
| 8    | 15.51 (3.10)             | 29.34 (1.14)           | 1.29 (0.70)                                 |
| 9    | 15.08 (3.09)             | 18.92 (3.57)           | 2.83 (1.40)                                 |
| 10   | 13.43 (2.15)             | 33.51 (0.49)           | 3.95 (3.72)                                 |
| 11   | 12.89 (2.14)             | 33.13 (0.57)           | 2.36 (1.12)                                 |
| 12   | 15.30 (3.39)             | 24.90 (2.20)           | 1.21 (0.59)                                 |
| 13   | 12.95 (4.28)             | 5.92 (0.45)            | 1.94 (1.07)                                 |
| 14   | 10.82 (2.39)             | 29.47 (1.35)           | 3.18 (2.55)                                 |
| 15   | 9.42 (2.49)              | 33.67 (0.37)           | 0.94 (0.81)                                 |
| 16   | 2.70 (2.74)              | 32.60 (0.53)           | 0.58 (0.54)                                 |
| 17   | 2.23 (3.46)              | 31.64 (0.97)           | 0.75 (0.61)                                 |

779

780

**table S5. List of R packages.** Packages and version used with the R software (v3.4.1) (56) for

781

data exploration, statistical analysis and graphing.

| Package      | Complete name                                                    | Version | Year | Author                      | Use                                          |
|--------------|------------------------------------------------------------------|---------|------|-----------------------------|----------------------------------------------|
| betareg      | Beta Regression                                                  | 3.1     | 2016 | Cribari-Neto & Zeileis (57) | Beta regression (GLM with beta distribution) |
| car          | Companion to Applied Regression                                  | 2.1-5   | 2017 | Fox et al. (58)             | Type III ANOVA table                         |
| ggplot2      | Create Elegant Data Visualisations Using the Grammar of Graphics | 2.2.1   | 2016 | Wickham et al. (59)         | Graphing                                     |
| lme4         | Linear Mixed-Effects Models using 'Eigen' and S4                 | 1.1-13  | 2017 | Bates et al. (60)           | Mixed-effect models (GLMMs)                  |
| lmeresampler | Bootstrap Methods for Nested Linear Mixed-Effects Models         | 0.1.0   | 2016 | Loy & Steele (61)           | Parametric bootstrap for nlme model          |
| lmerTest     | Tests in Linear Mixed Effects Models                             | 2.0-33  | 2016 | Kuznetsova et al. (62)      | Wald approximated confidence intervals       |
| MuMIn        | Pseudo-R-squared for Generalized Mixed-Effect models             | 1.40.0  | 2017 | Barton (63)                 |                                              |

|          |                                                                                 |         |      |                          |                                                                                                    |
|----------|---------------------------------------------------------------------------------|---------|------|--------------------------|----------------------------------------------------------------------------------------------------|
| nlme     | Linear and Nonlinear Mixed Effects Models                                       | 3.1-131 | 2017 | Pinheiro et al. (64)     | Mixed-effect models (GLMMs), variance structure (GLS), spatial correlation                         |
| pbrktest | Parametric Bootstrap and Kenward Roger Based Methods for Mixed Model Comparison | 0.4-7   | 2017 | Halekoh & Højsgaard (65) | Kenward-Roger approximations for degrees of freedom and parametric bootstrap for model comparisons |
| RLRsim   | Exact (Restricted) Likelihood Ratio Tests for Mixed and Additive Models         | 3.1-3   | 2016 | Scheipl et al. (66)      | random effect simulation, exact restricted likelihood ratio tests simulations                      |

---

782

783

## SUPPLEMENTARY MATERIALS AND METHODS

784

**Protocol for Thermal Gravimetric Analyses.** Thermogravimetric Analyses (TGA) are reported following the guidelines made by the Committee on Standardisation of the International Confederation for Thermal Analysis and Calorimetry (ICTAC) and appeared in standards as ASTM E 472 (1991) (67, 68).

787

### A. Properties of the sample

788

#### 1. Source of material and identification

789

- Shell of wild Atlantic blue mussel (*Mytilus edulis*).

790

- Prismatic layer composed of calcium carbonate (CaCO<sub>3</sub>, calcite), variable amount of organics (~1-2%) and trace elements, such as quartzite (SiO<sub>2</sub>) and magnesium

791

792

(Mg).

793

794

## 2. *Sample history*

795

- Shells were cleaned, raised with mill-Q water, dried at room temperature for seven days.

796

797

- The periostracum was removed by sanding and a tile of prismatic layer isolated (8 x 5 mm) with a Dremel rotary tool (Dremel 300/395RD MultiPro, Racine, Wisconsin, USA).

798

799

800

- Samples were cleaned in an ultrasonic bath (Ultrasonic Cleaner CD-4800, Practical Systems Inc., Odessa, FL, USA) with mill-Q water, air-dried and powdered with an agate mortar.

801

802

803

- Additional, oven drying (30°C for 24h, convection oven) to remove residual pre-treatment water.

804

805

## 3. *Physical properties*

806

- Fine grade powder.

807

## **B. Experimental conditions**

808

### 1. *Apparatus used*

809

- Thermogravimetric Analyser: TGA Q500, TA instrument (New Castle, DE, USA) Q series.

810

811

### 2. *Thermal treatment*

812

- Initial temperature, ~25°C (room temperature).

813

- Final temperature, 700°C.

814

- Linear rate of heating, 10°C min<sup>-1</sup>.

815

### 3. *Sample atmosphere*

816

- Dynamic (flowing) atmosphere.



- 817                   • Flow rate for balance 40 ml min<sup>-1</sup> and for sample 60ml min<sup>-1</sup>.  
818                   • Gas composition: nitrogen, “white spot”.

819                   4. *Sample holder*

- 820                   • Platinum crucible, cylindrical: diameter 10 mm and height 1.5 mm.  
821                   • Sample was tipped and spread to cover the bottom of the crucible.

822                   5. *Sample mass*

- 823                   • 10 mg of powder were weighted on a separate micro-balance (Ultramicro 4504  
824                   MP8, Sartorius, Göttingen; readability 0.1 µg).

825                   **C. Data acquisition and manipulation methods**

826                   1. *Software version*

- 827                   • Universal Analysis 2000, version 4.5A, TA instrument (New Castle, DE, USA).  
828

829                   **SUPPLEMENTARY DATA**

830                   **Environmental datasets.** List of the datasets used for the calculation of mean annual values of  
831                   environmental descriptors. Water temperature, salinity and chlorophyll-a concentrations were  
832                   expressed as mean values (May - October) averaged over the 6-year period 2009 - 2014. This  
833                   study has been conducted using the Copernicus Marine Service Products: COPERNICUS -  
834                   Marine Environment Monitoring System (<http://marine.copernicus.eu/>).

835                   **DATASET #1**

836                   *Product identifier*                   **GLOBAL\_ANALYSIS\_FORECAST\_PHY\_001\_024**

837                   *Link (last accessed on 26-02-2018)* [http://marine.copernicus.eu/services-portfolio/access-to-](http://marine.copernicus.eu/services-portfolio/access-to-products/?option=com_csw&view=details&product_id=GLOBAL_ANALYSIS_FORECAST_PHY_001_024)  
838                   products/?option=com\_csw&view=details&product\_id=GL  
839                   OBAL\_ANALYSIS\_FORECAST\_PHY\_001\_024

|     |                                           |                                                                                                                                                                                                                                           |
|-----|-------------------------------------------|-------------------------------------------------------------------------------------------------------------------------------------------------------------------------------------------------------------------------------------------|
| 840 | <i>Short description</i>                  | The Operational Mercator global Ocean analysis and                                                                                                                                                                                        |
| 841 |                                           | forecast system at 1/12 degree is providing 7 days of 3D                                                                                                                                                                                  |
| 842 |                                           | global ocean forecasts updated daily and ocean analysis                                                                                                                                                                                   |
| 843 |                                           | updated weekly. The time series start on January 1 <sup>st</sup> 2013                                                                                                                                                                     |
| 844 |                                           | and is aggregated in time in order to reach a two full years'                                                                                                                                                                             |
| 845 |                                           | time series sliding window. This product includes daily                                                                                                                                                                                   |
| 846 |                                           | mean files of temperature, salinity, currents, sea level and                                                                                                                                                                              |
| 847 |                                           | ice parameters from the top to the bottom of the Ocean over                                                                                                                                                                               |
| 848 |                                           | the Global Ocean. It also includes 2-hourly mean surface                                                                                                                                                                                  |
| 849 |                                           | fields for temperature, currents and sea level.                                                                                                                                                                                           |
| 850 | <i>Spatial resolution</i>                 | 0.08 degree                                                                                                                                                                                                                               |
| 851 | <i>Vertical coverage</i>                  | from -5500.0 m to 0.0 m                                                                                                                                                                                                                   |
| 852 | <i>Temporal resolution</i>                | Daily mean, hourly mean                                                                                                                                                                                                                   |
| 853 | <i>Update frequency</i>                   | Daily                                                                                                                                                                                                                                     |
| 854 | <i>Production unit</i>                    | GLO-MERCATOR-TOULOUSE-FR                                                                                                                                                                                                                  |
| 855 |                                           |                                                                                                                                                                                                                                           |
| 856 | <b>DATASET #2</b>                         |                                                                                                                                                                                                                                           |
| 857 | <i>Product identifier</i>                 | <b>NORTHWESTSHELF_ANALYSIS_FORECAST_BIO_004_</b>                                                                                                                                                                                          |
| 858 |                                           | <b>002_b</b>                                                                                                                                                                                                                              |
| 859 | <i>Link (last accessed on 26-02-2018)</i> | <a href="http://marine.copernicus.eu/services-portfolio/access-to-products/?option=com_csw&amp;view=details&amp;product_id=NORTHWESTSHELF_ANALYSIS_FORECAST_BIO_004_002_b">http://marine.copernicus.eu/services-portfolio/access-to-</a>  |
| 860 |                                           | <a href="http://marine.copernicus.eu/services-portfolio/access-to-products/?option=com_csw&amp;view=details&amp;product_id=NORTHWESTSHELF_ANALYSIS_FORECAST_BIO_004_002_b">products/?option=com_csw&amp;view=details&amp;product_id=N</a> |
| 861 |                                           | <a href="http://marine.copernicus.eu/services-portfolio/access-to-products/?option=com_csw&amp;view=details&amp;product_id=NORTHWESTSHELF_ANALYSIS_FORECAST_BIO_004_002_b">ORTHWESTSHELF_ANALYSIS_FORECAST_BIO_004</a>                    |
| 862 |                                           | <a href="http://marine.copernicus.eu/services-portfolio/access-to-products/?option=com_csw&amp;view=details&amp;product_id=NORTHWESTSHELF_ANALYSIS_FORECAST_BIO_004_002_b">_002_b</a>                                                     |

|     |                                           |                                                                                                                                                                                                                           |
|-----|-------------------------------------------|---------------------------------------------------------------------------------------------------------------------------------------------------------------------------------------------------------------------------|
| 863 | <i>Short description</i>                  | The Forecasting Ocean Assimilation Model, Atlantic                                                                                                                                                                        |
| 864 |                                           | Margin model (FOAM AMM7) is a coupled                                                                                                                                                                                     |
| 865 |                                           | hydrodynamic-ecosystem model, nested in a series of one-                                                                                                                                                                  |
| 866 |                                           | way nests to the Met Office global ocean model. The                                                                                                                                                                       |
| 867 |                                           | hydrodynamics are supplied by the Nucleus for European                                                                                                                                                                    |
| 868 |                                           | Modelling of the Ocean (NEMO) with the 3DVar                                                                                                                                                                              |
| 869 |                                           | NEMOVAR system used for the assimilation of sea surface                                                                                                                                                                   |
| 870 |                                           | temperature data. This is coupled to the European Regional                                                                                                                                                                |
| 871 |                                           | Seas Ecosystem Model (ERSEM), developed at Plymouth                                                                                                                                                                       |
| 872 |                                           | Marine Laboratory (PML). ERSEM based models have                                                                                                                                                                          |
| 873 |                                           | been used operationally to forecast biogeochemistry in the                                                                                                                                                                |
| 874 |                                           | region for a number of years.                                                                                                                                                                                             |
| 875 | <i>Spatial resolution</i>                 | 0.11 x 0.7 degree                                                                                                                                                                                                         |
| 876 | <i>Vertical coverage</i>                  | from -5000 m to 0 m                                                                                                                                                                                                       |
| 877 | <i>Temporal resolution</i>                | Daily mean                                                                                                                                                                                                                |
| 878 | <i>Update frequency</i>                   | Daily                                                                                                                                                                                                                     |
| 879 | <i>Production unit</i>                    | NWS-METOFFICE-EXETER-UK                                                                                                                                                                                                   |
| 880 |                                           |                                                                                                                                                                                                                           |
| 881 | <b>DATASET #3</b>                         |                                                                                                                                                                                                                           |
| 882 | <i>Product identifier</i>                 | <b>GLOBAL_REANALYSIS_BIO_001_018</b>                                                                                                                                                                                      |
| 883 | <i>Link (last accessed on 26-02-2018)</i> | <a href="http://marine.copernicus.eu/services-portfolio/access-to-products/?option=com_csw&amp;view=details&amp;product_id=GLOBAL_REANALYSIS_BIO_001_018">http://marine.copernicus.eu/services-portfolio/access-to-</a>   |
| 884 |                                           | <a href="http://marine.copernicus.eu/services-portfolio/access-to-products/?option=com_csw&amp;view=details&amp;product_id=GLOBAL_REANALYSIS_BIO_001_018">products/?option=com_csw&amp;view=details&amp;product_id=GL</a> |
| 885 |                                           | <a href="http://marine.copernicus.eu/services-portfolio/access-to-products/?option=com_csw&amp;view=details&amp;product_id=GLOBAL_REANALYSIS_BIO_001_018">OBAL_REANALYSIS_BIO_001_018</a>                                 |

|     |                                           |                                                                                                                                                                                                                                           |
|-----|-------------------------------------------|-------------------------------------------------------------------------------------------------------------------------------------------------------------------------------------------------------------------------------------------|
| 886 | <i>Short description</i>                  | Biogeochemistry simulation over period 1998 - 2015.                                                                                                                                                                                       |
| 887 |                                           | Outputs are delivered as monthly mean files with .netcdf                                                                                                                                                                                  |
| 888 |                                           | format (CF/COARDS 1.5 convention) on the native tri-                                                                                                                                                                                      |
| 889 |                                           | polar grid (ORCA025) at ¼° resolution with 75 vertical                                                                                                                                                                                    |
| 890 |                                           | levels. This simulation is based on the PISCES                                                                                                                                                                                            |
| 891 |                                           | biogeochemical model. It is forced offline at a daily                                                                                                                                                                                     |
| 892 |                                           | frequency by the equivalent of the GLOBAL-                                                                                                                                                                                                |
| 893 |                                           | REANALYSIS-PHYS-001-009 physics product.                                                                                                                                                                                                  |
| 894 | <i>Spatial resolution</i>                 | 0.11 degree                                                                                                                                                                                                                               |
| 895 | <i>Vertical coverage</i>                  | from -5500.0 m to 0.0 m                                                                                                                                                                                                                   |
| 896 | <i>Temporal resolution</i>                | Daily mean                                                                                                                                                                                                                                |
| 897 | <i>Update frequency</i>                   | Daily                                                                                                                                                                                                                                     |
| 898 | <i>Production unit</i>                    | GLO-MERCATOR-TOULOUSE-FR                                                                                                                                                                                                                  |
| 899 |                                           |                                                                                                                                                                                                                                           |
| 900 |                                           |                                                                                                                                                                                                                                           |
| 901 | <b>DATASET #3</b>                         |                                                                                                                                                                                                                                           |
| 902 | <i>Product identifier</i>                 | <b>NORTHWESTSHELF_ANALYSIS_FORECAST_BIO_004_</b>                                                                                                                                                                                          |
| 903 |                                           | <b>002_b</b>                                                                                                                                                                                                                              |
| 904 | <i>Link (last accessed on 26-02-2018)</i> | <a href="http://marine.copernicus.eu/services-portfolio/access-to-products/?option=com_csw&amp;view=details&amp;product_id=NORTHWESTSHELF_ANALYSIS_FORECAST_BIO_004_002_b">http://marine.copernicus.eu/services-portfolio/access-to-</a>  |
| 905 |                                           | <a href="http://marine.copernicus.eu/services-portfolio/access-to-products/?option=com_csw&amp;view=details&amp;product_id=NORTHWESTSHELF_ANALYSIS_FORECAST_BIO_004_002_b">products/?option=com_csw&amp;view=details&amp;product_id=N</a> |
| 906 |                                           | <a href="http://marine.copernicus.eu/services-portfolio/access-to-products/?option=com_csw&amp;view=details&amp;product_id=NORTHWESTSHELF_ANALYSIS_FORECAST_BIO_004_002_b">ORTHWESTSHELF_ANALYSIS_FORECAST_BIO_004</a>                    |
| 907 |                                           | <a href="http://marine.copernicus.eu/services-portfolio/access-to-products/?option=com_csw&amp;view=details&amp;product_id=NORTHWESTSHELF_ANALYSIS_FORECAST_BIO_004_002_b">_002_b</a>                                                     |

|     |                                           |                                                                                                                                                                                                                                  |
|-----|-------------------------------------------|----------------------------------------------------------------------------------------------------------------------------------------------------------------------------------------------------------------------------------|
| 908 | <i>Short description</i>                  | The Forecasting Ocean Assimilation Model, Atlantic                                                                                                                                                                               |
| 909 |                                           | Margin model (FOAM AMM7) is a coupled                                                                                                                                                                                            |
| 910 |                                           | hydrodynamic-ecosystem model, nested in a series of one-                                                                                                                                                                         |
| 911 |                                           | way nests to the Met Office global ocean model. The                                                                                                                                                                              |
| 912 |                                           | hydrodynamics are supplied by the Nucleus for European                                                                                                                                                                           |
| 913 |                                           | Modelling of the Ocean (NEMO) with the 3DVar                                                                                                                                                                                     |
| 914 |                                           | NEMOVAR system used for the assimilation of sea surface                                                                                                                                                                          |
| 915 |                                           | temperature data. This is coupled to the European Regional                                                                                                                                                                       |
| 916 |                                           | Seas Ecosystem Model (ERSEM), developed at Plymouth                                                                                                                                                                              |
| 917 |                                           | Marine Laboratory (PML). ERSEM based models have                                                                                                                                                                                 |
| 918 |                                           | been used operationally to forecast biogeochemistry in the                                                                                                                                                                       |
| 919 |                                           | region for a number of years.                                                                                                                                                                                                    |
| 920 | <i>Spatial resolution</i>                 | 0.11 x 0.7 degree                                                                                                                                                                                                                |
| 921 | <i>Vertical coverage</i>                  | from -5000 m to 0 m                                                                                                                                                                                                              |
| 922 | <i>Temporal resolution</i>                | Daily mean                                                                                                                                                                                                                       |
| 923 | <i>Update frequency</i>                   | Daily                                                                                                                                                                                                                            |
| 924 | <i>Production unit</i>                    | NWS-METOFFICE-EXETER-UK                                                                                                                                                                                                          |
| 925 |                                           |                                                                                                                                                                                                                                  |
| 926 | <b>DATASET #4</b>                         |                                                                                                                                                                                                                                  |
| 927 | <i>Product identifier</i>                 | <b>NORTHWESTSHELF_REANALYSIS_BIO_004_011</b>                                                                                                                                                                                     |
| 928 | <i>Link (last accessed on 26-02-2018)</i> | <a href="http://marine.copernicus.eu/services-portfolio/access-to-products/?option=com_csw&amp;view=details&amp;product_id=NORTHWESTSHELF_REANALYSIS_BIO_004_011">http://marine.copernicus.eu/services-portfolio/access-to</a>   |
| 929 |                                           | <a href="http://marine.copernicus.eu/services-portfolio/access-to-products/?option=com_csw&amp;view=details&amp;product_id=NORTHWESTSHELF_REANALYSIS_BIO_004_011">products/?option=com_csw&amp;view=details&amp;product_id=N</a> |
| 930 |                                           | <a href="http://marine.copernicus.eu/services-portfolio/access-to-products/?option=com_csw&amp;view=details&amp;product_id=NORTHWESTSHELF_REANALYSIS_BIO_004_011">ORTHWESTSHELF_REANALYSIS_BIO_004_011</a>                       |



954

**DATASET #5**

955

*Product identifier*      **BALTICSEA\_ANALYSIS\_FORECAST\_PHYS\_003\_006**

956

*Link (last accessed on 26-02-2018)*    [http://marine.copernicus.eu/services-portfolio/access-to-](http://marine.copernicus.eu/services-portfolio/access-to-products/?option=com_csw&view=details&product_id=BALTICSEA_ANALYSIS_FORECAST_PHY_003_006)

957

[products/?option=com\\_csw&view=details&product\\_id=B](http://marine.copernicus.eu/services-portfolio/access-to-products/?option=com_csw&view=details&product_id=BALTICSEA_ANALYSIS_FORECAST_PHY_003_006)

958

[ALTICSEA\\_ANALYSIS\\_FORECAST\\_PHY\\_003\\_006](http://marine.copernicus.eu/services-portfolio/access-to-products/?option=com_csw&view=details&product_id=BALTICSEA_ANALYSIS_FORECAST_PHY_003_006)

959

*Short description*

This Baltic Sea physical model product provides forecasts

960

for the physical conditions in the Baltic Sea. The Baltic

961

forecast is updated twice daily providing a new two days

962

forecast with hourly data for sea level variations, ice

963

concentration and thickness at the surface, and temperature,

964

salinity and horizontal velocities for the 3D field. The

965

product is based on the 3D ocean model code HBM

966

developed within the Baltic ocean community.

967

*Spatial resolution*

2 km

968

*Vertical coverage*

from -5500.0 m to 0.0 m

969

*Temporal resolution*

Daily mean, hourly mean

970

*Update frequency*

Daily

971

*Production unit*

GLO-MERCATOR-TOULOUSE-FR

972

973

**DATASET #6**

974

*Product identifier*      **BALTICSEA\_ANALYSIS\_FORECAST\_BIO\_003\_007**

|     |                                           |                                                                                                                                                                                                                                    |
|-----|-------------------------------------------|------------------------------------------------------------------------------------------------------------------------------------------------------------------------------------------------------------------------------------|
| 975 | <i>Link (last accessed on 26-02-2018)</i> | <a href="http://marine.copernicus.eu/services-portfolio/access-to-products/?option=com_csw&amp;view=details&amp;product_id=BALTICSEA_ANALYSIS_FORECAST_BIO_003_007">http://marine.copernicus.eu/services-portfolio/access-to-</a>  |
| 976 |                                           | <a href="http://marine.copernicus.eu/services-portfolio/access-to-products/?option=com_csw&amp;view=details&amp;product_id=BALTICSEA_ANALYSIS_FORECAST_BIO_003_007">products/?option=com_csw&amp;view=details&amp;product_id=B</a> |
| 977 |                                           | <a href="http://marine.copernicus.eu/services-portfolio/access-to-products/?option=com_csw&amp;view=details&amp;product_id=BALTICSEA_ANALYSIS_FORECAST_BIO_003_007">ALTICSEA_ANALYSIS_FORECAST_BIO_003_007</a>                     |
| 978 | <i>Short description</i>                  | This Baltic Sea biogeochemical model product provides                                                                                                                                                                              |
| 979 |                                           | forecasts for the biogeochemical conditions in the Baltic                                                                                                                                                                          |
| 980 |                                           | Sea. The Baltic forecast is updated twice daily providing a                                                                                                                                                                        |
| 981 |                                           | new two days forecast with hourly data for the parameters                                                                                                                                                                          |
| 982 |                                           | dissolved oxygen, nitrate, phosphate, chl-a. The product is                                                                                                                                                                        |
| 983 |                                           | produced by the biogeochemical model ERGOM one way                                                                                                                                                                                 |
| 984 |                                           | coupled to the Baltic 3D ocean model HBM, which                                                                                                                                                                                    |
| 985 |                                           | provides the CMEMS Baltic physical ocean forecast                                                                                                                                                                                  |
| 986 |                                           | product.                                                                                                                                                                                                                           |
| 987 | <i>Spatial resolution</i>                 | 2 km                                                                                                                                                                                                                               |
| 988 | <i>Vertical coverage</i>                  | from -400 m to 0 m                                                                                                                                                                                                                 |
| 989 | <i>Temporal resolution</i>                | Daily mean, hourly instantaneous                                                                                                                                                                                                   |
| 990 | <i>Update frequency</i>                   | Daily                                                                                                                                                                                                                              |
| 991 | <i>Production unit</i>                    | BAL-DMI-COPENHAGEN-DK                                                                                                                                                                                                              |
| 992 |                                           |                                                                                                                                                                                                                                    |
